# Supplementary material for: Remarkable influence of substituent in ionic liquid in control of reaction: simple, efficient and hazardous organic solvent free procedure for the synthesis of 2-aryl benzimidazoles promoted by ionic liquid, [pmim]BF4
Source: Royal Society of Chemistry journal article supplement (doi:10.1039/b823543k), 2009-01-01

## Supplementary Information

### **Remarkable influence of substituent in ionic liquid in control of reaction: simple, efficient and hazardous organic solvent free procedure for the synthesis of 2-aryl benzimidazoles promoted by ionic liquid, [pmim]BF<sub>4</sub>**

**Debasree Saha, Amit Saha and Brindaban C. Ranu \***

Copies of <sup>1</sup>H NMR, <sup>13</sup>C NMR and HRMS spectra of all the products listed in Table 2, copies of <sup>1</sup>H NMR spectra of ionic liquid, [pmim]BF<sub>4</sub> of the fresh and recovered (after reaction) samples and copies of <sup>1</sup>H NMR and HRMS spectra of compounds obtained as products listed in entries 8 and 10, Table 3

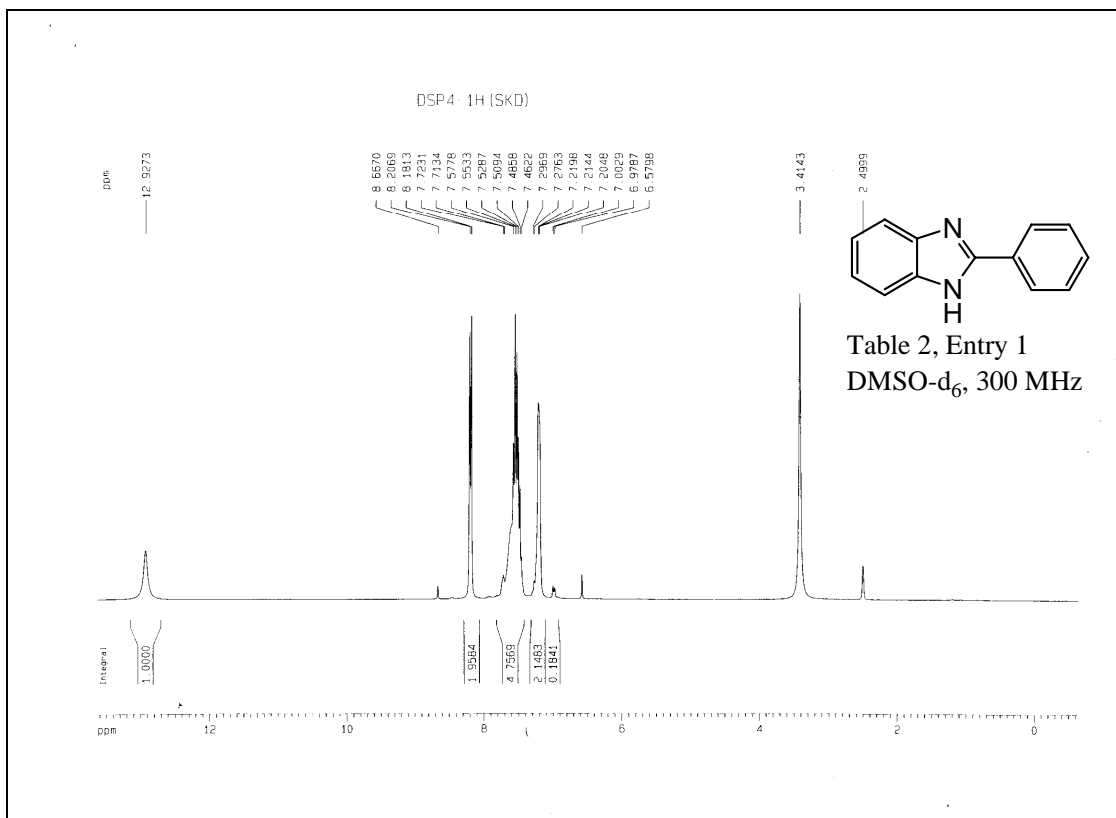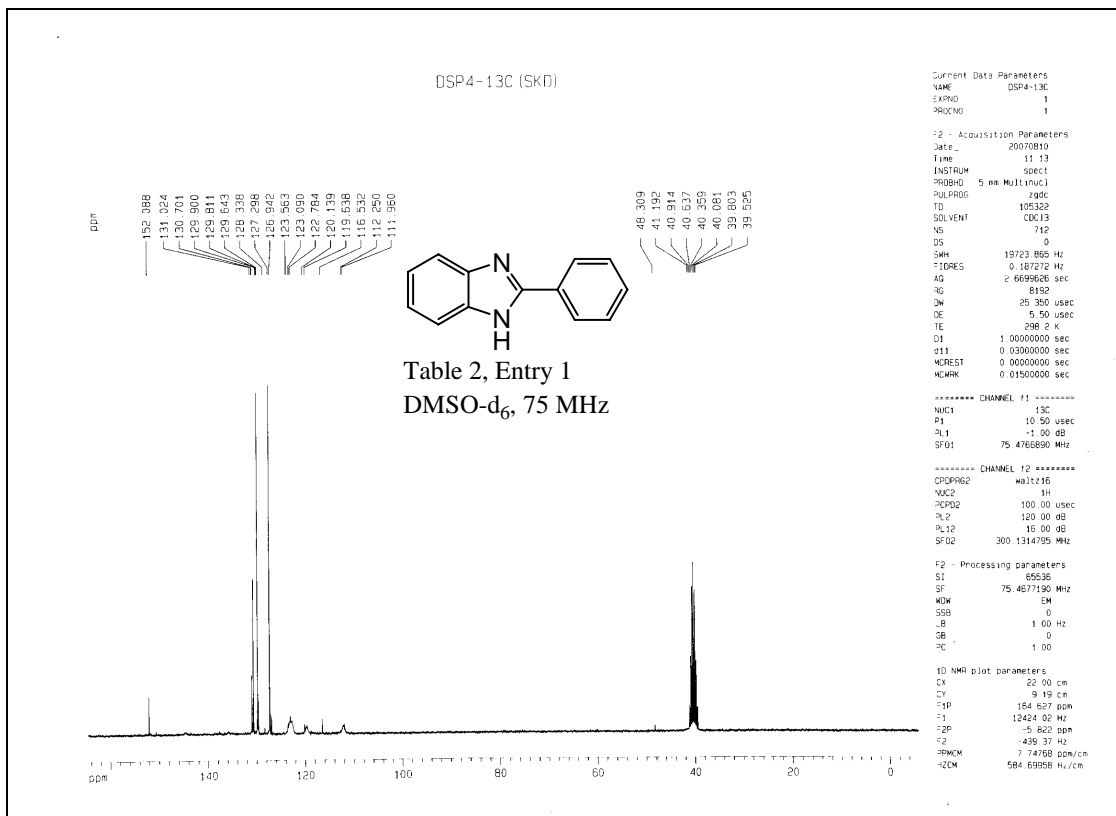

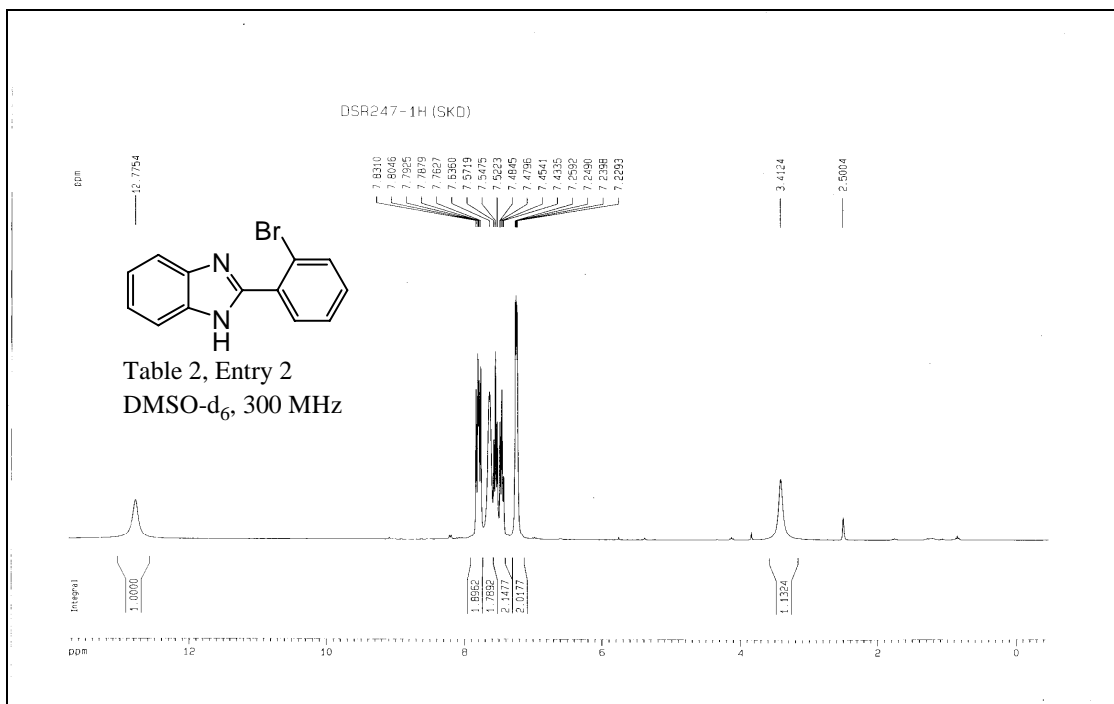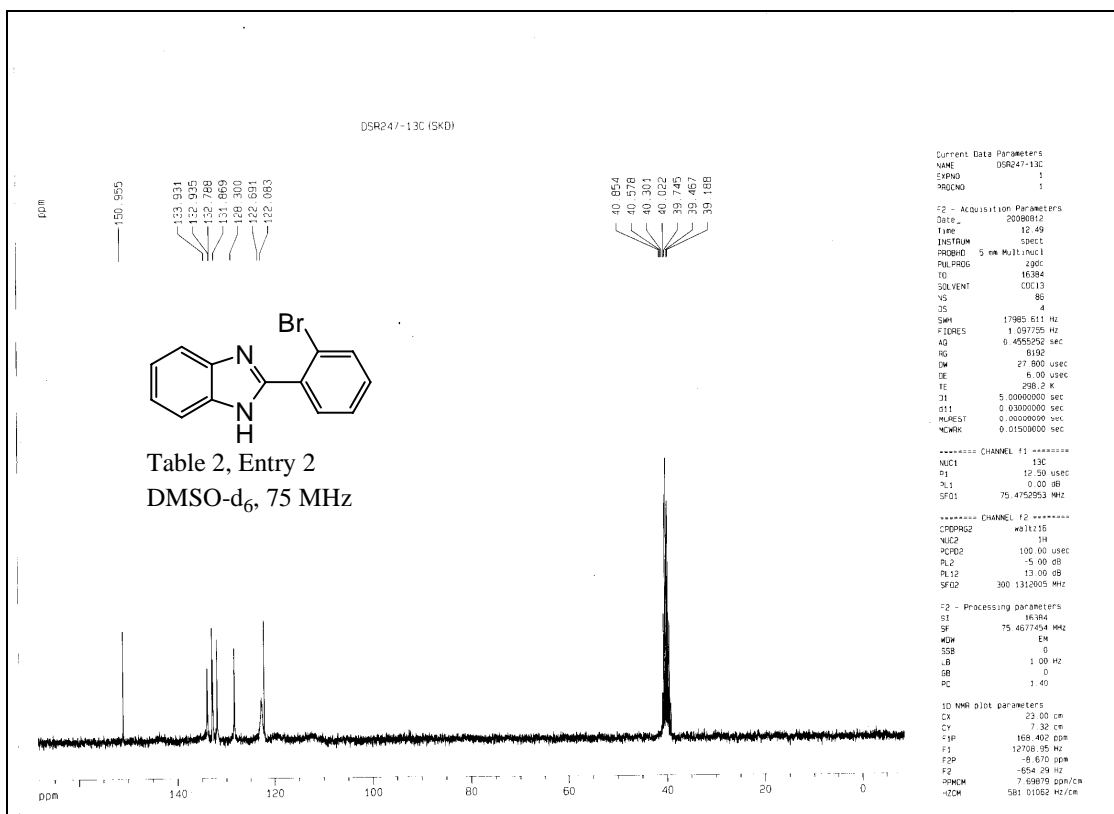

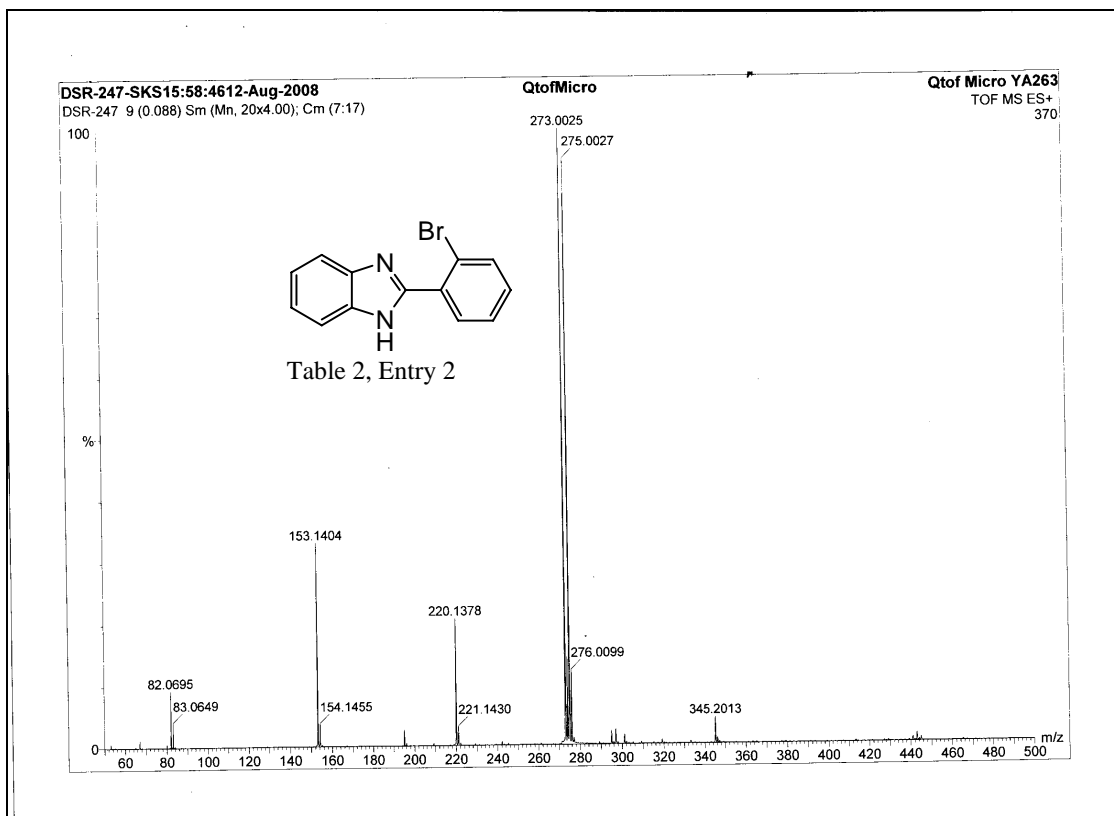

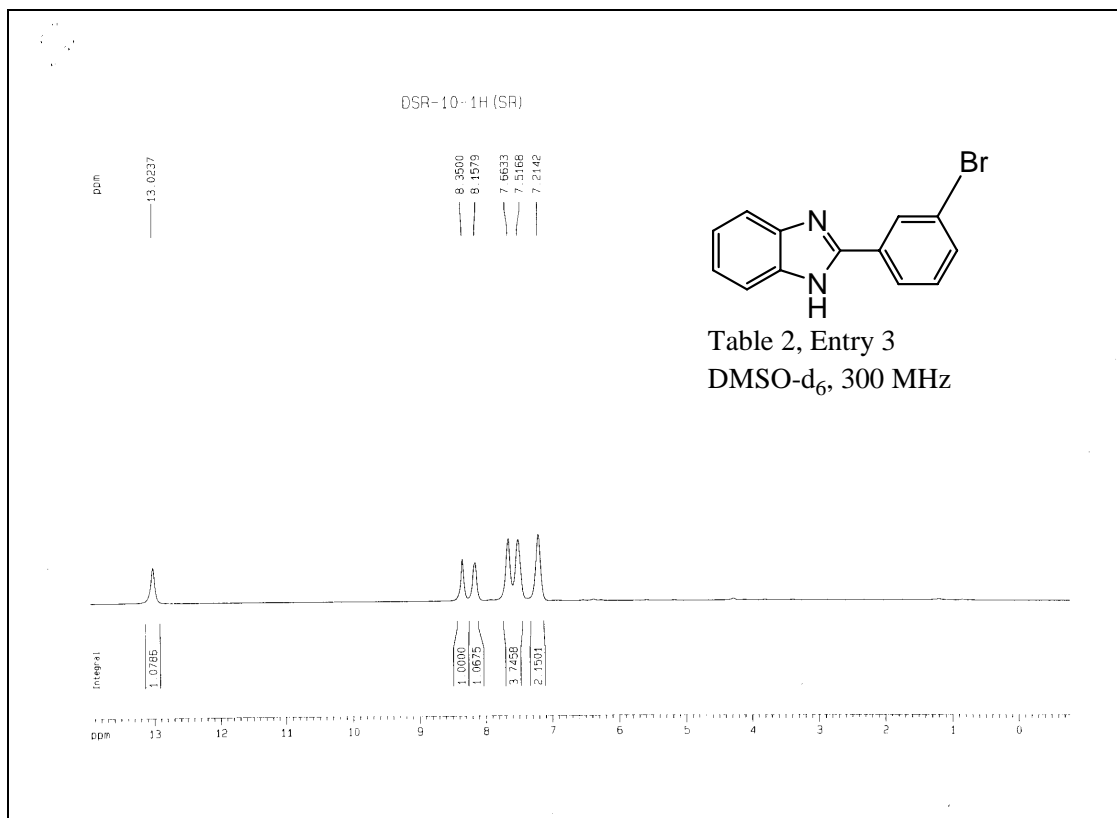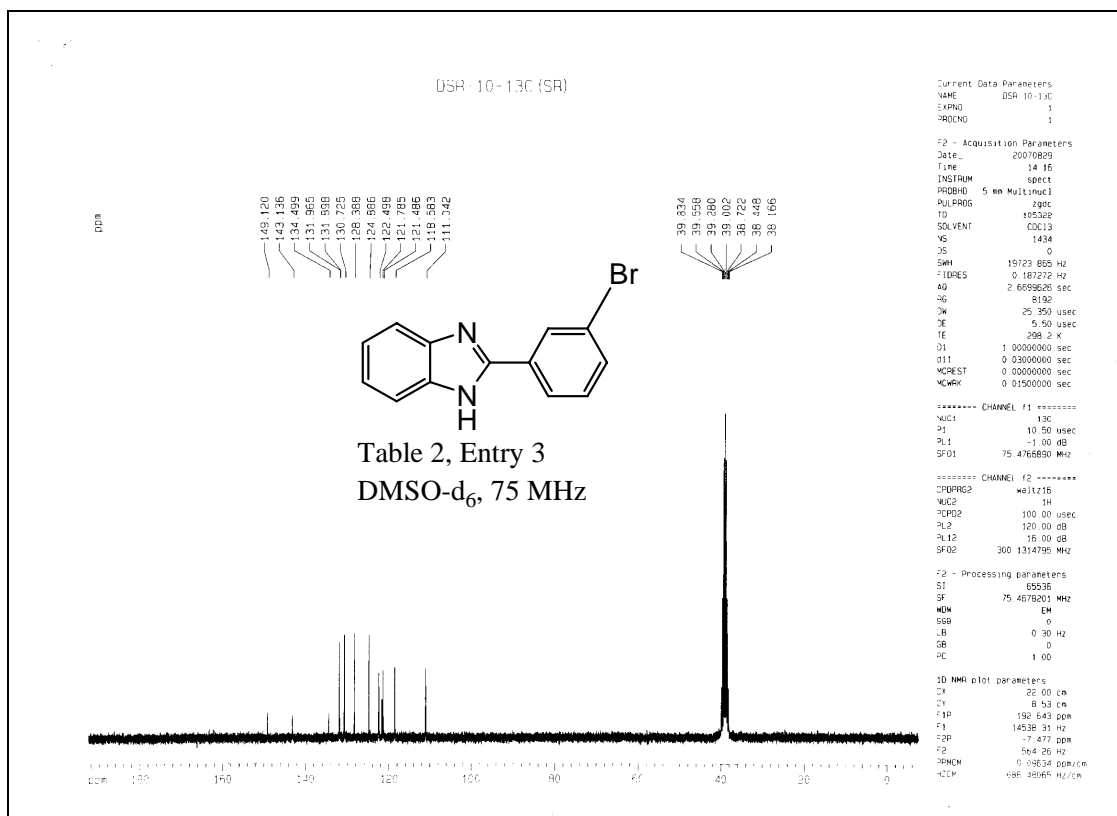

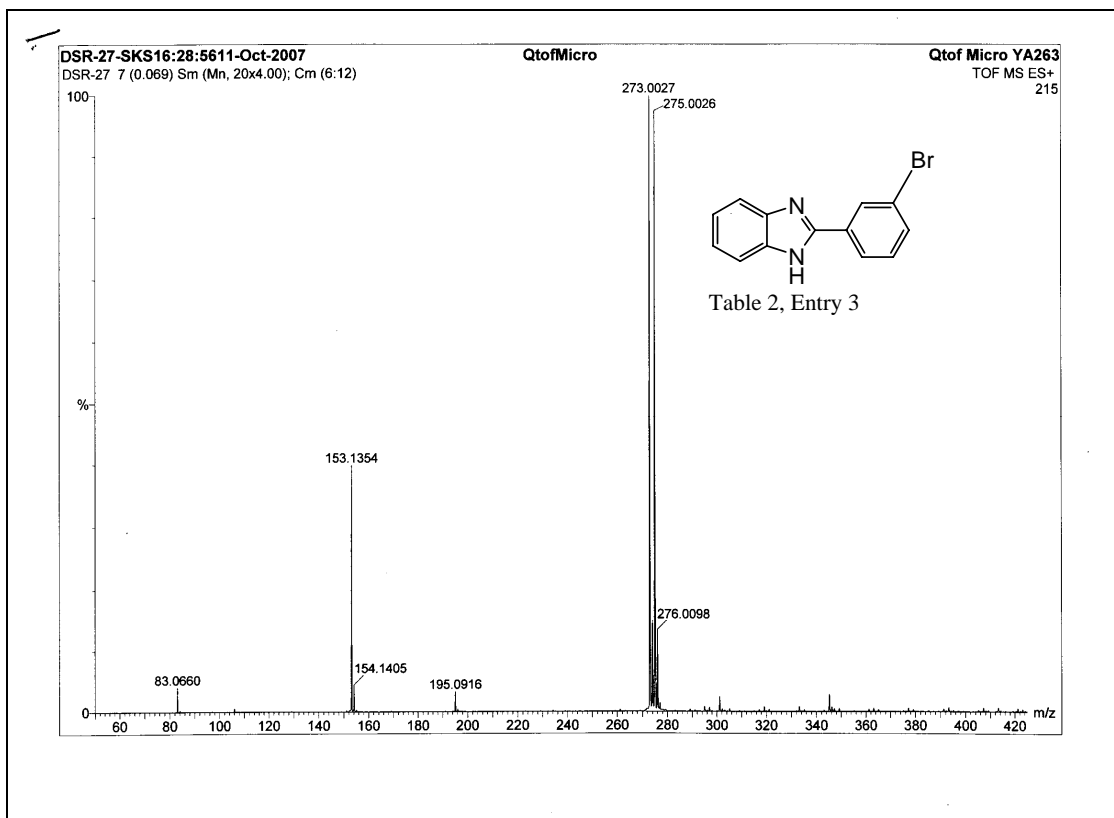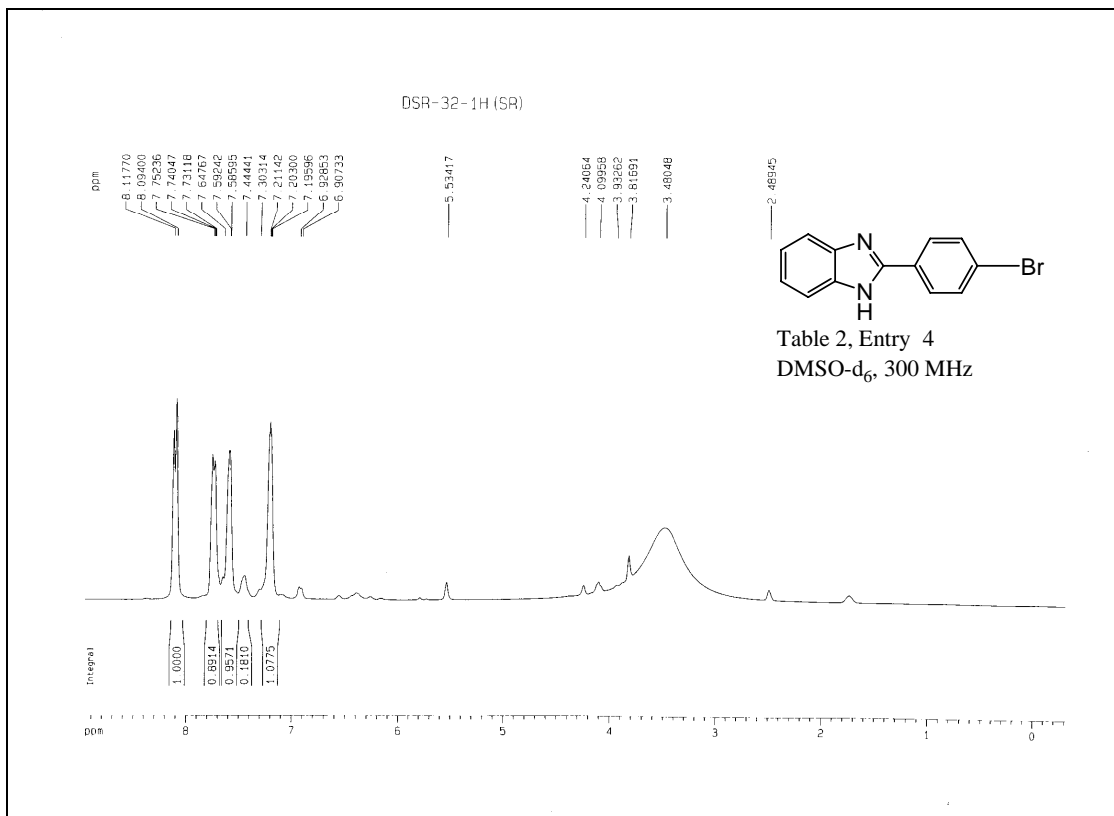

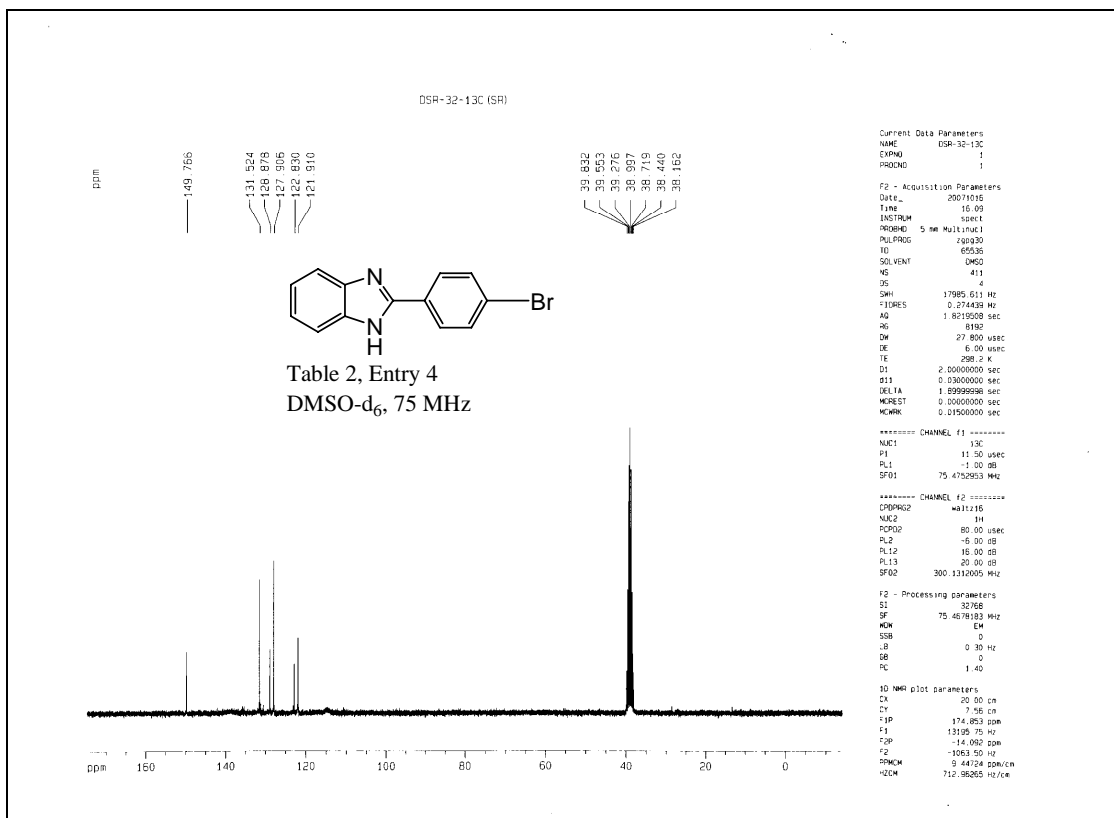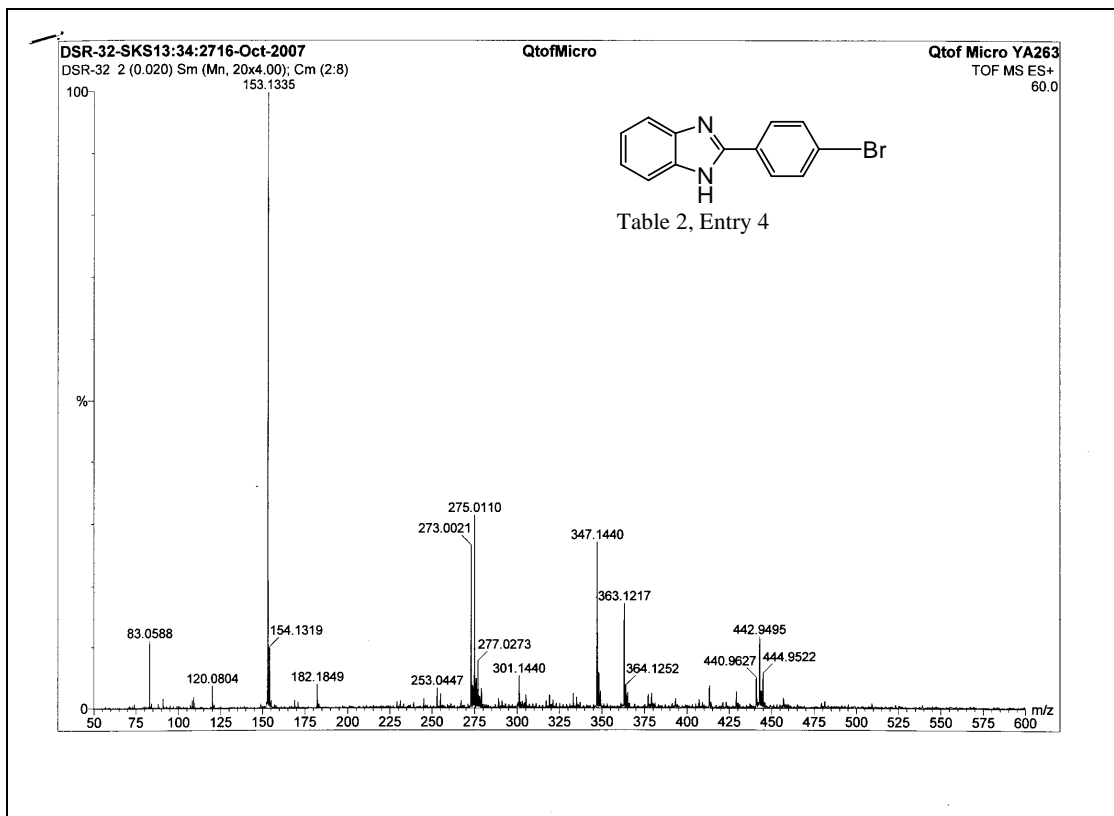

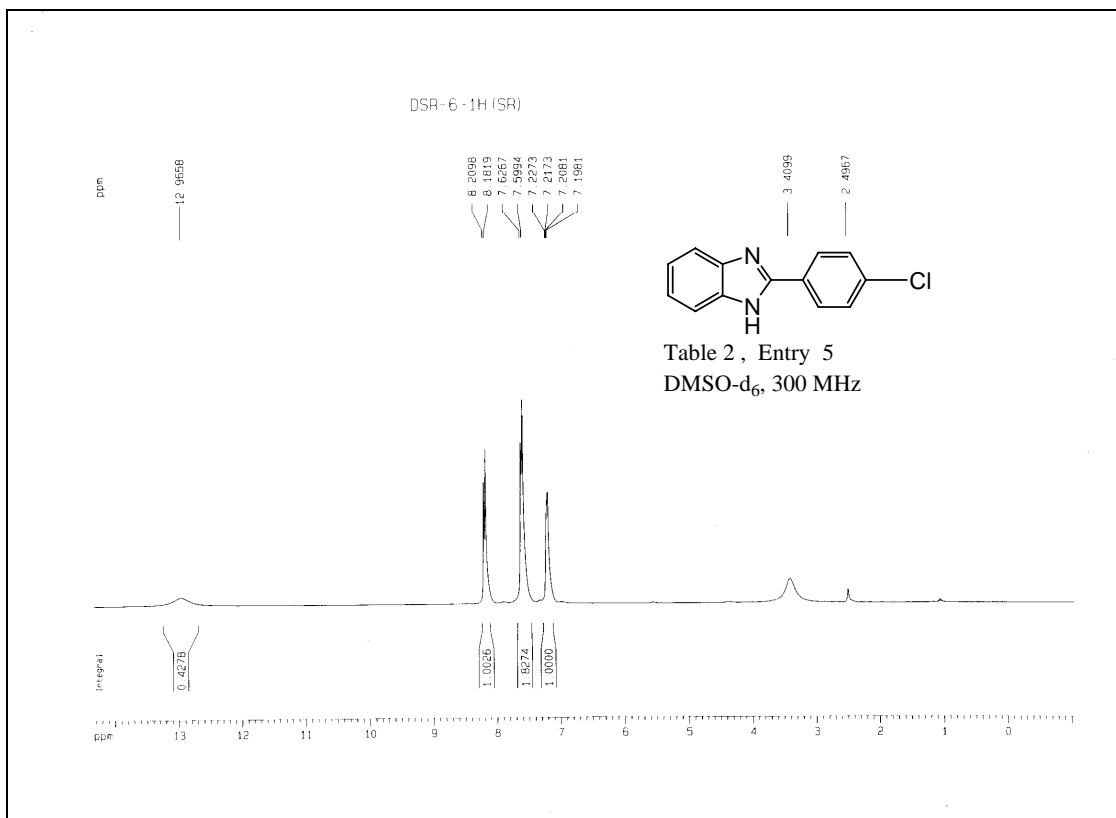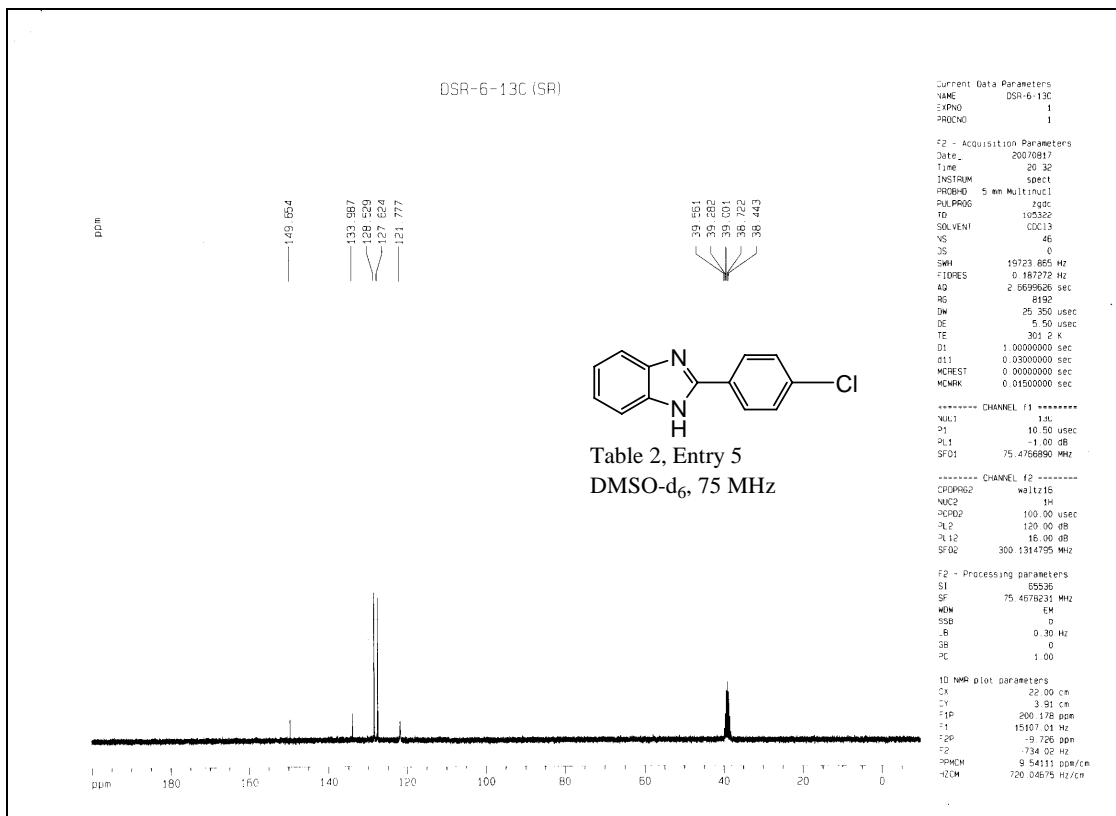



Supplementary Material (ESI) for Green Chemistry  
This journal is © The Royal Society of Chemistry 2009

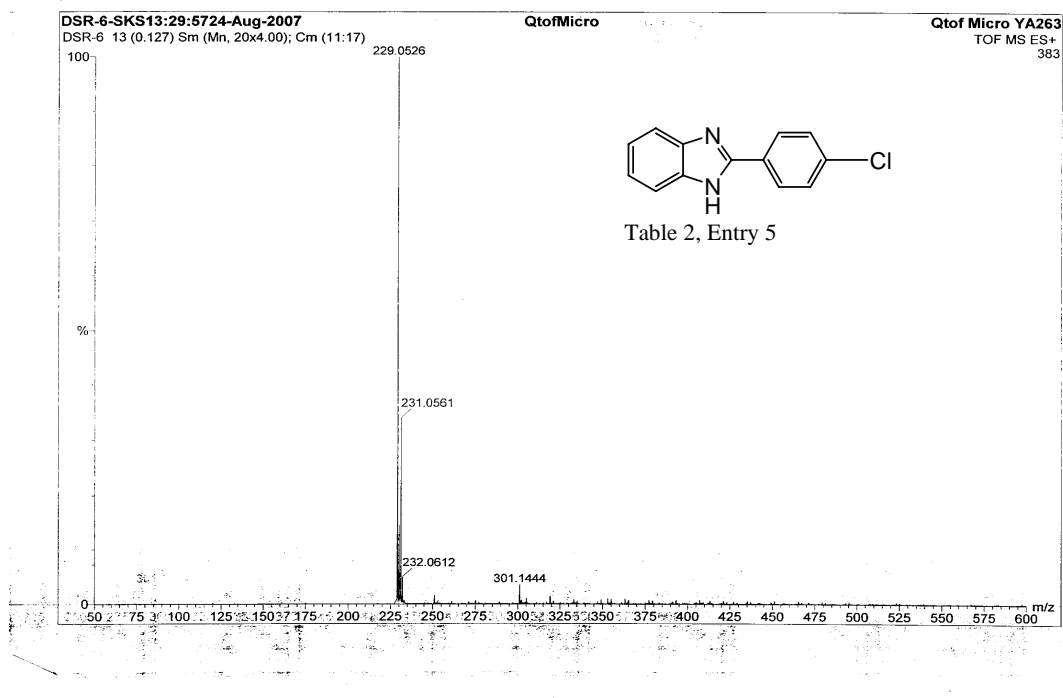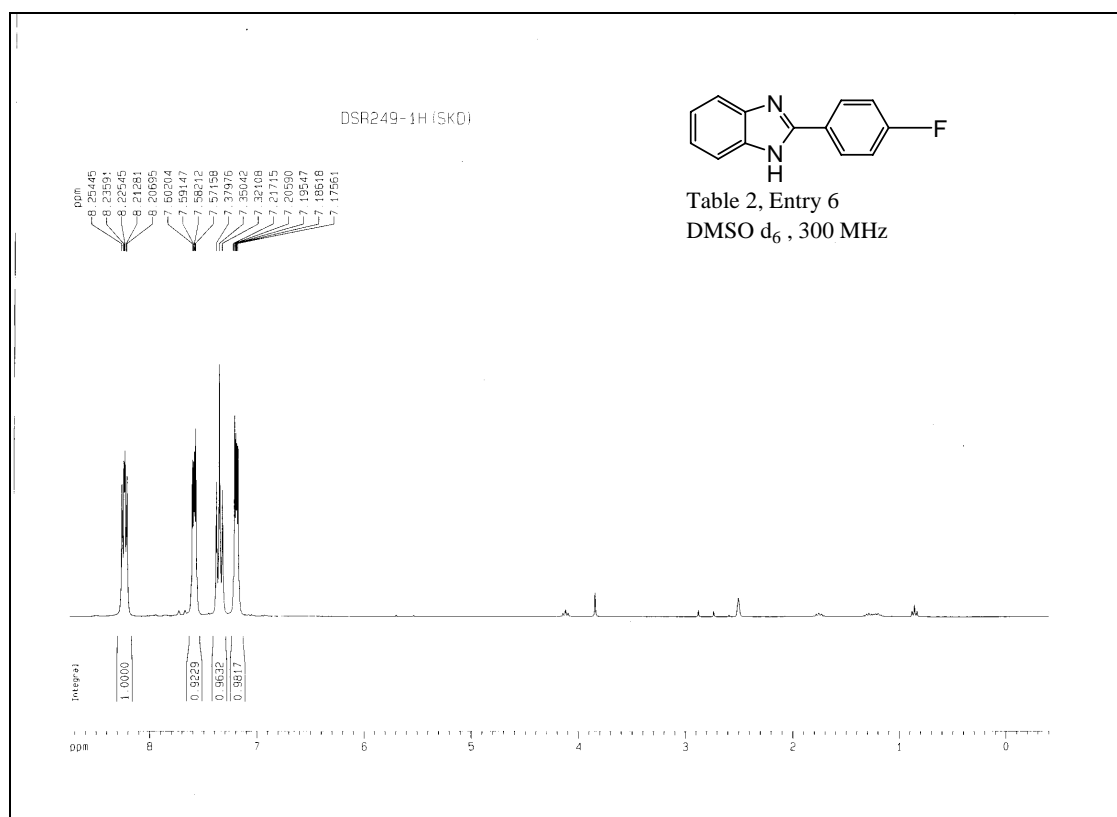

Supplementary Material (ESI) for Green Chemistry  
This journal is © The Royal Society of Chemistry 2009

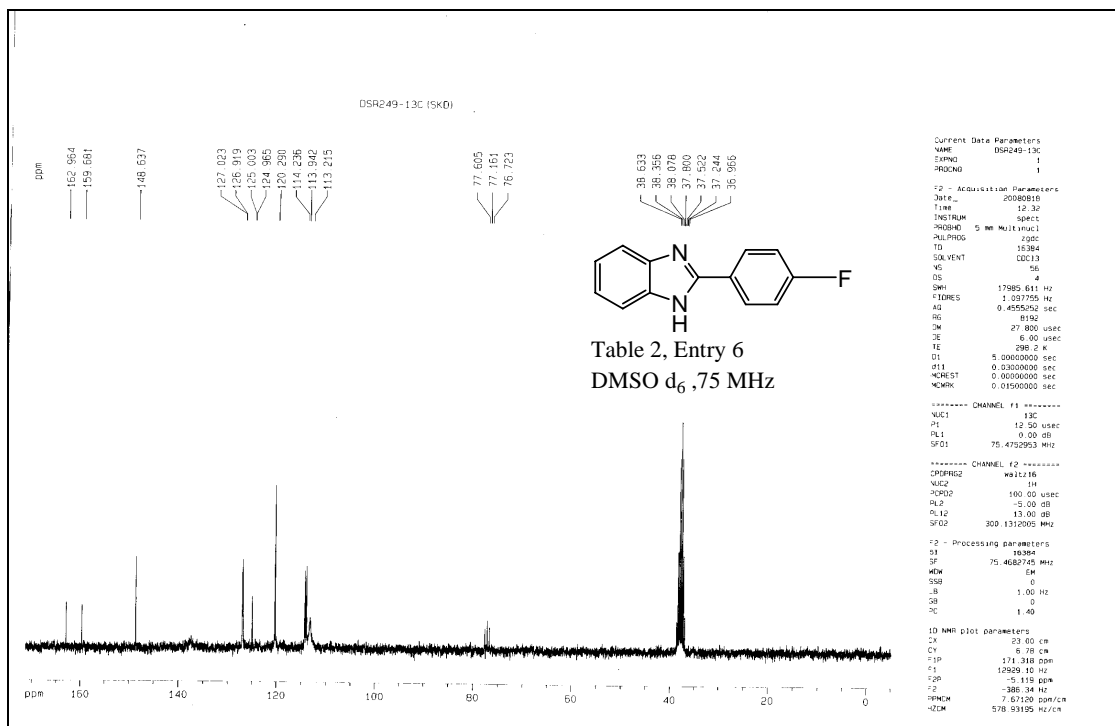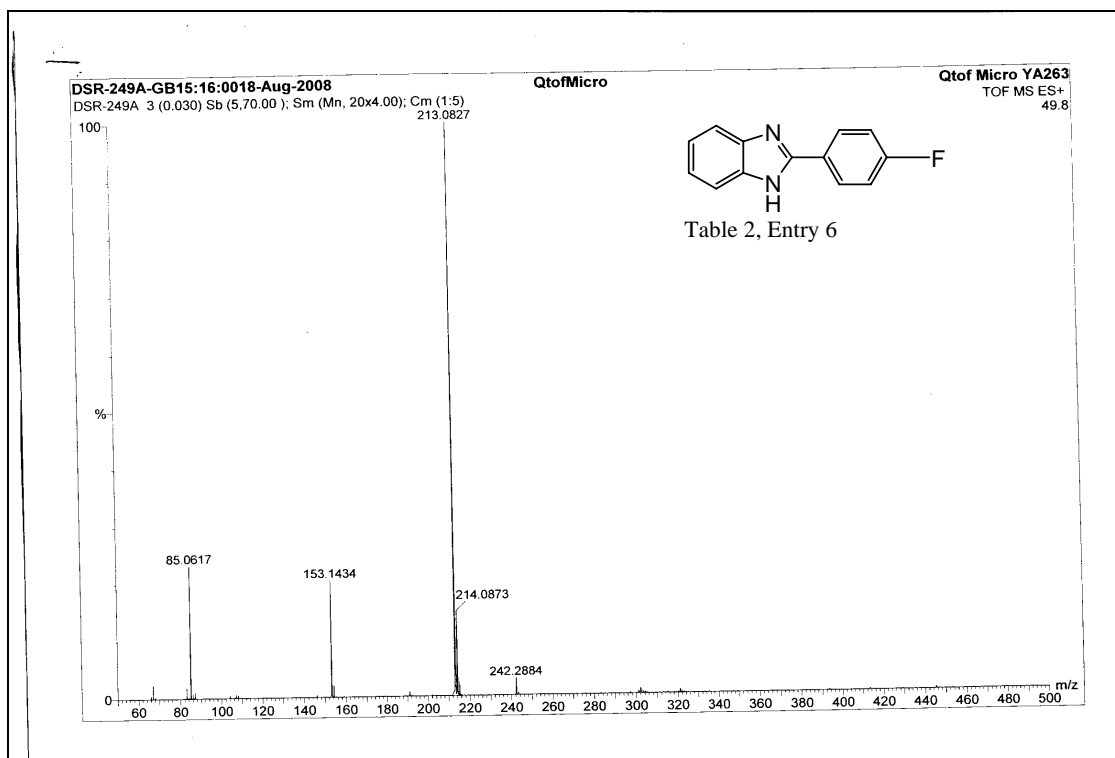

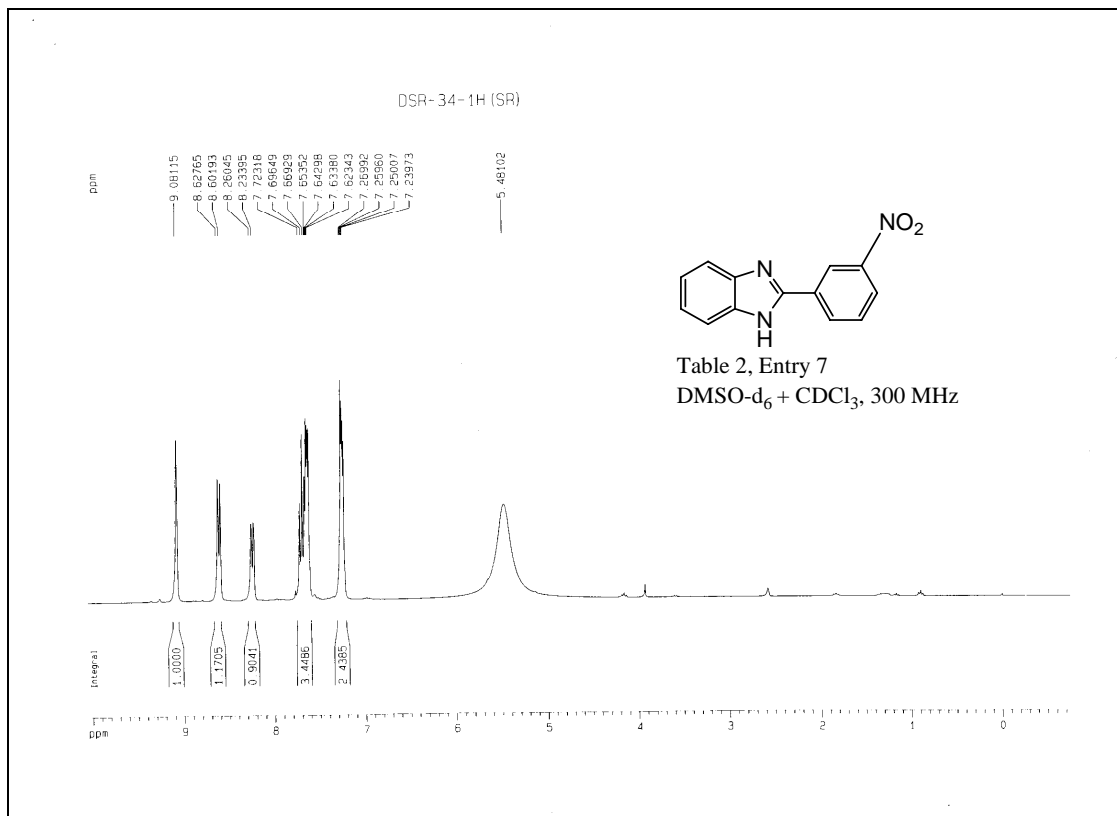

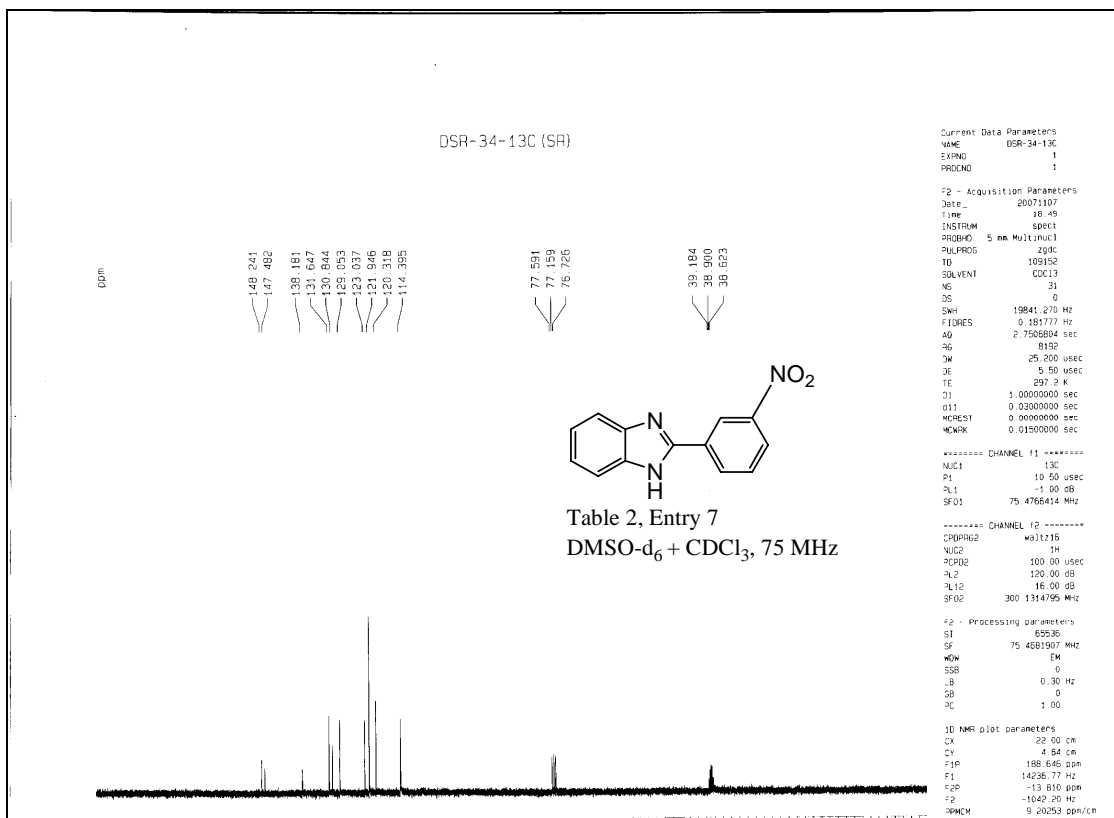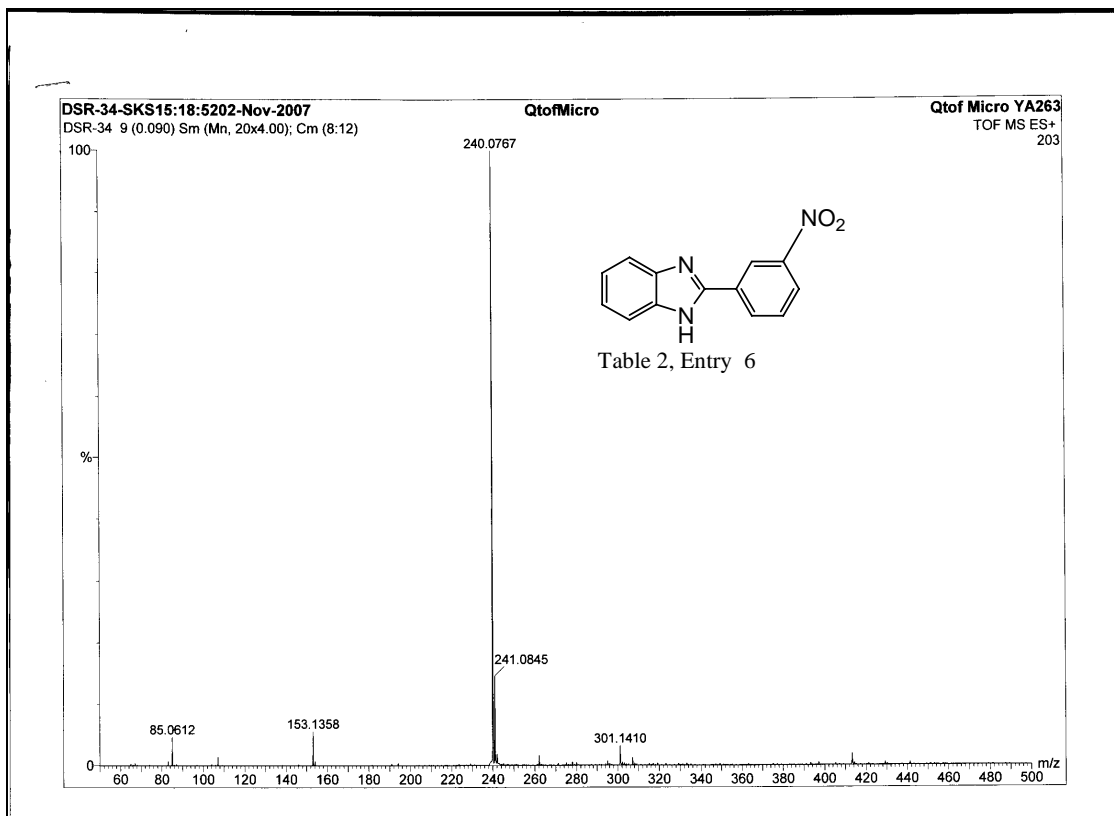

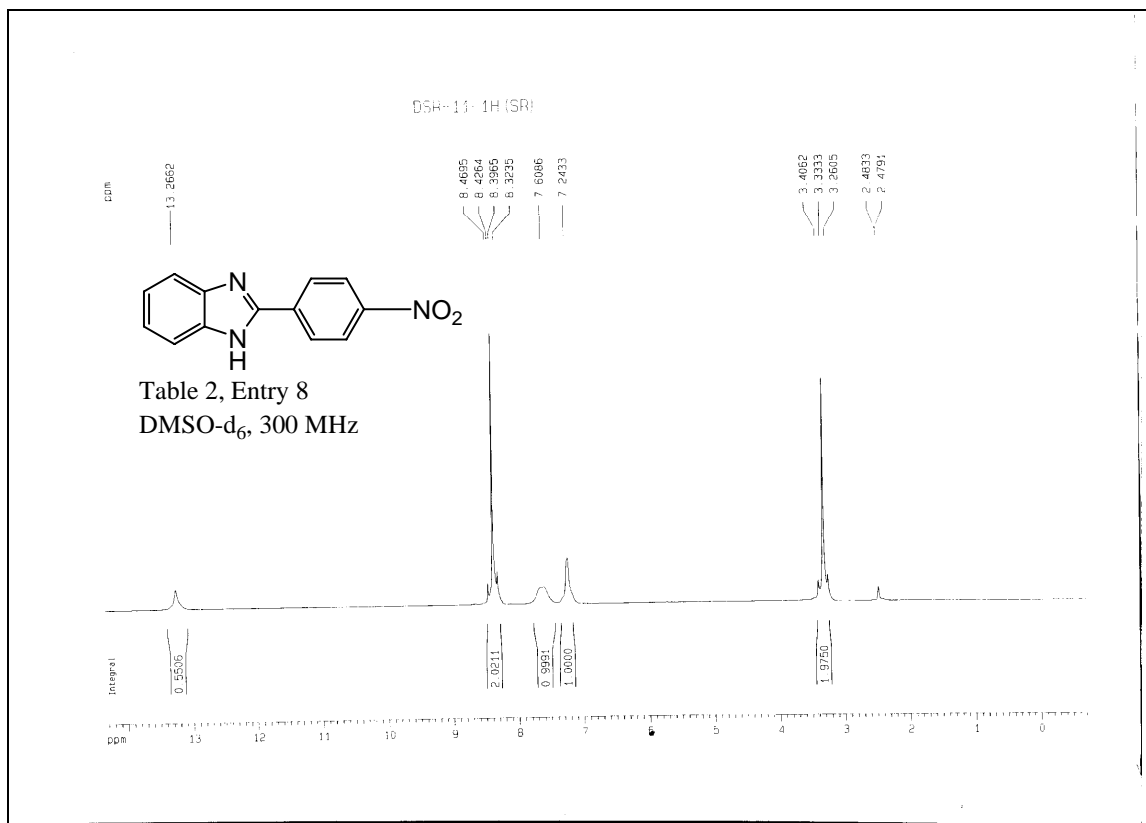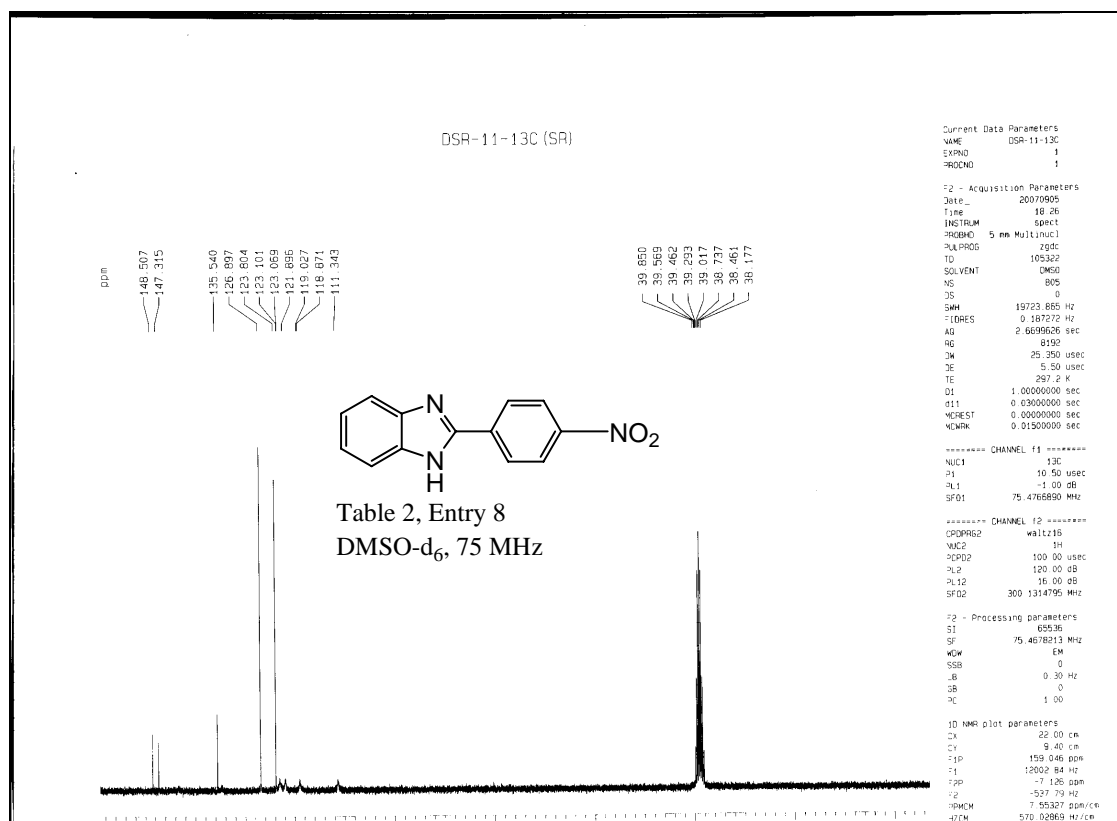

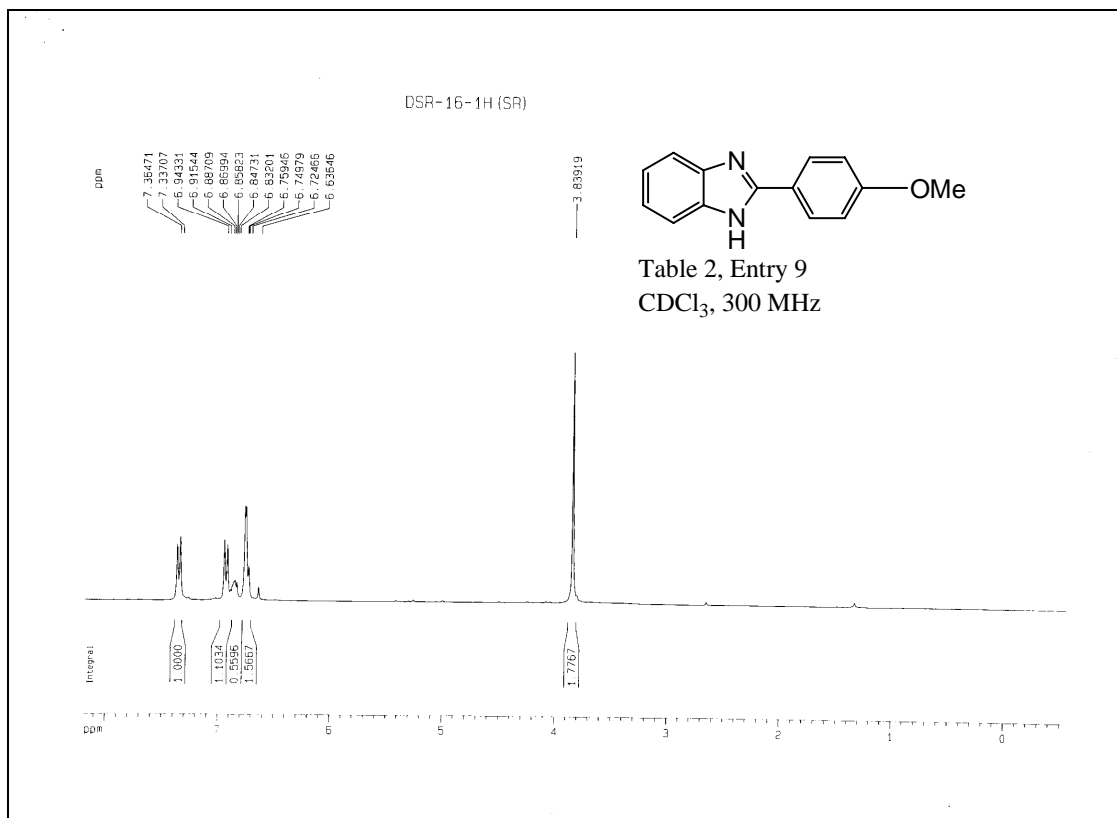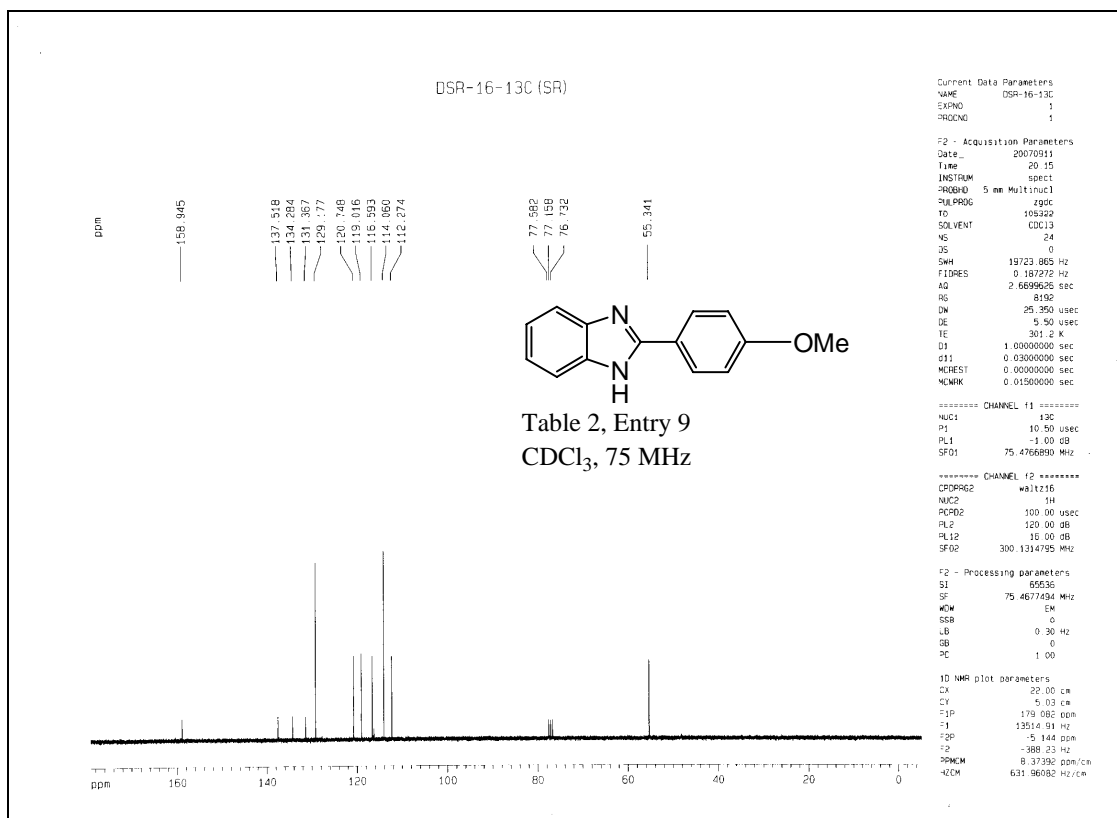

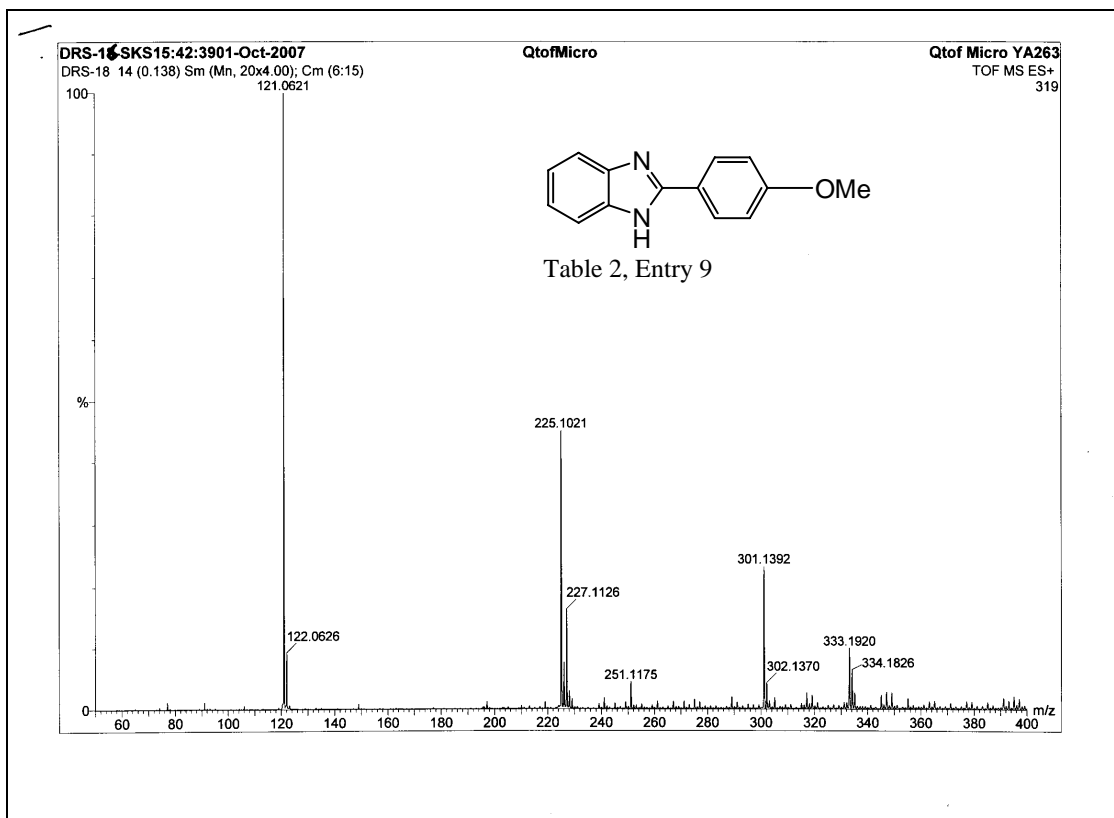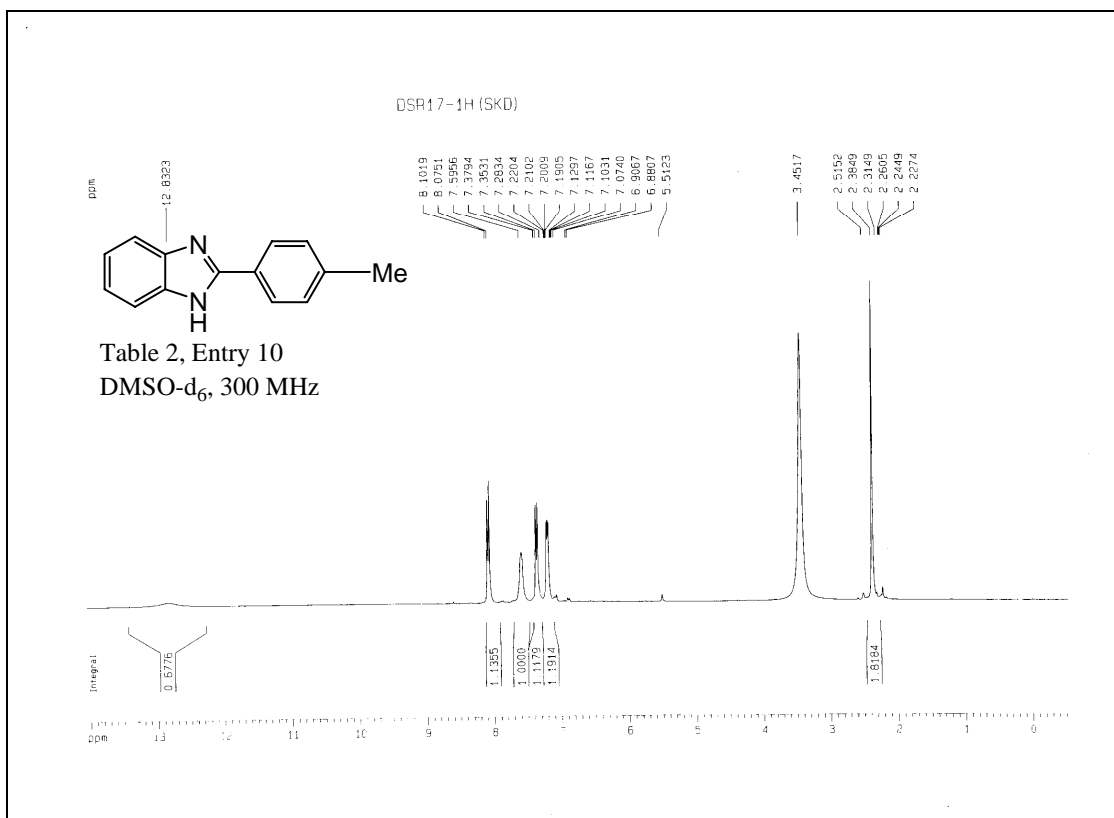

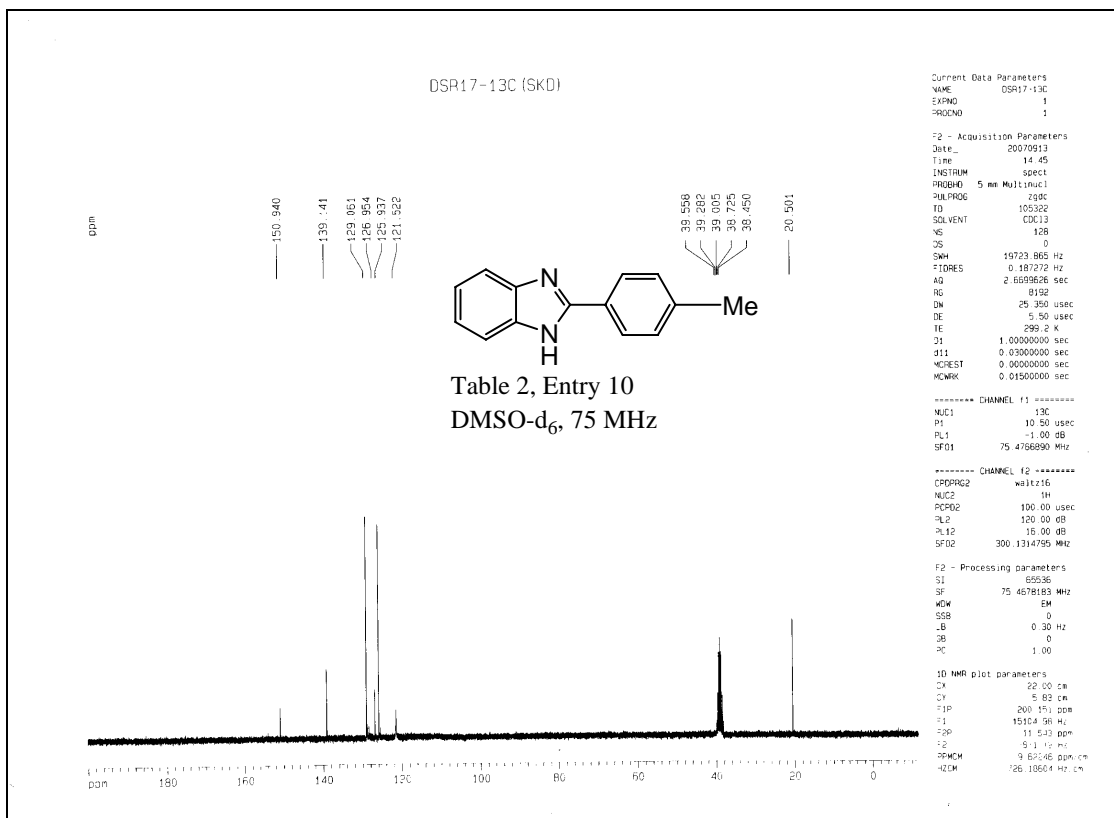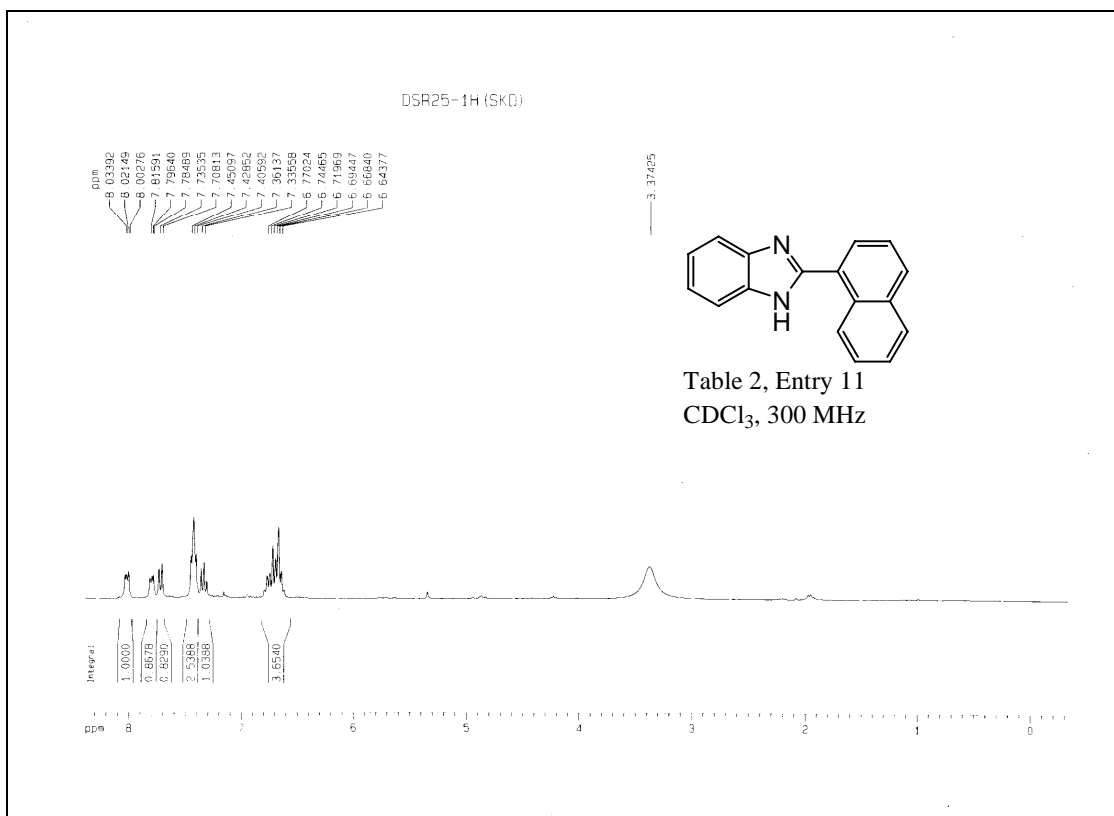



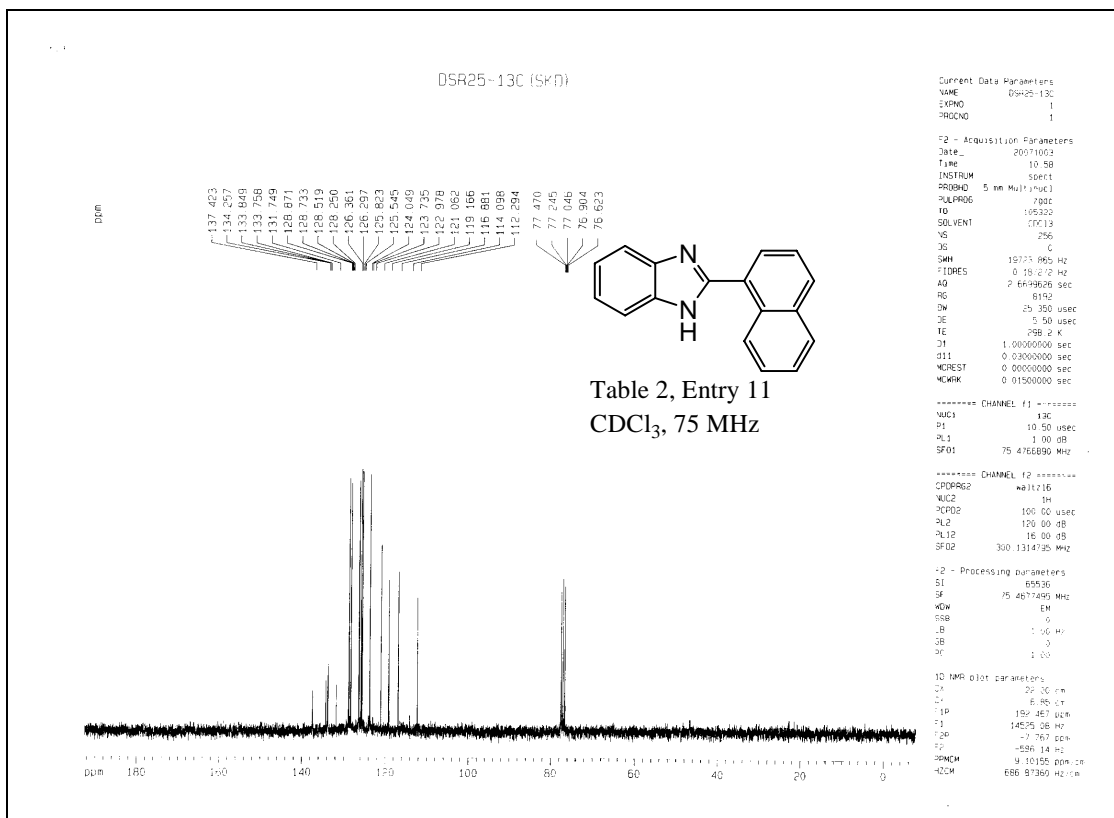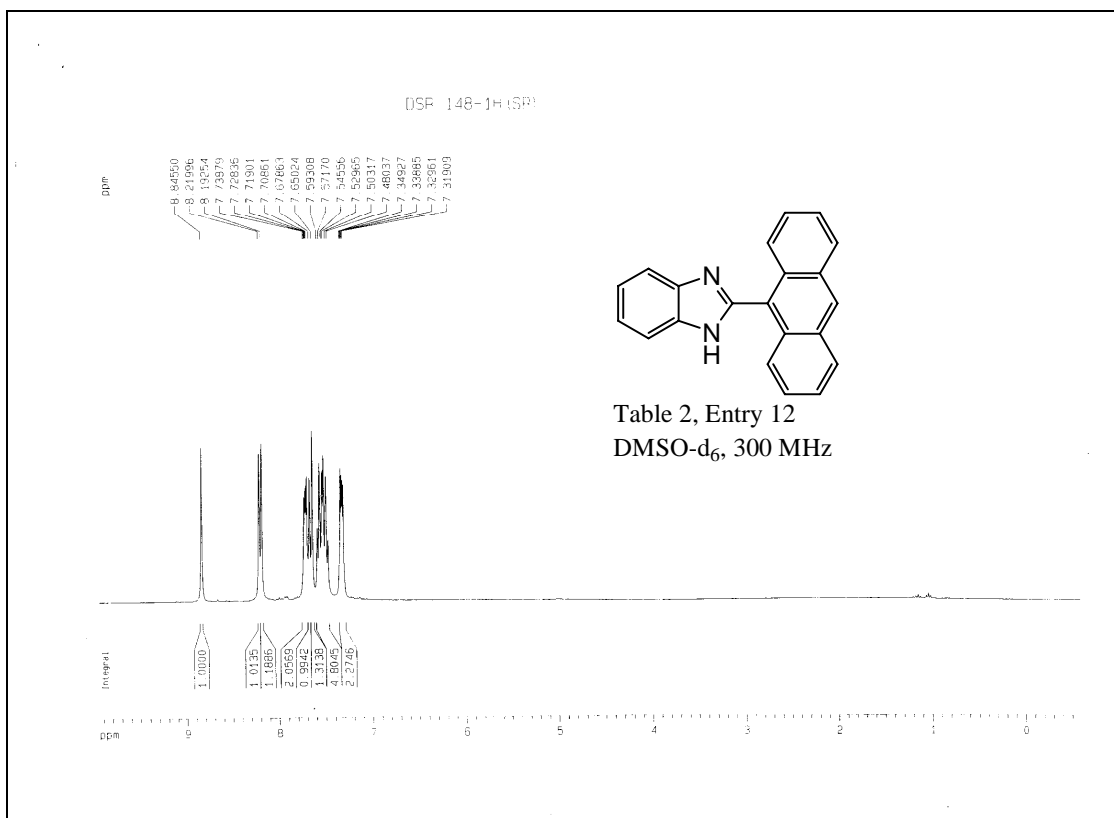

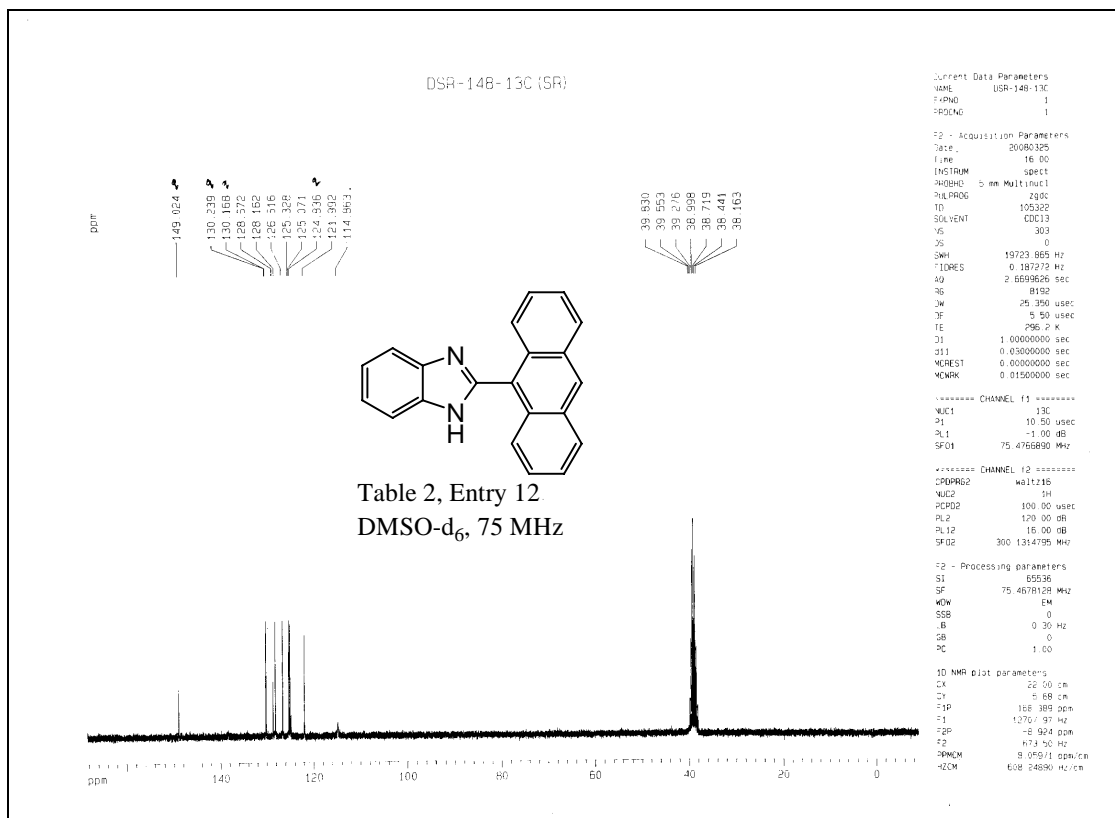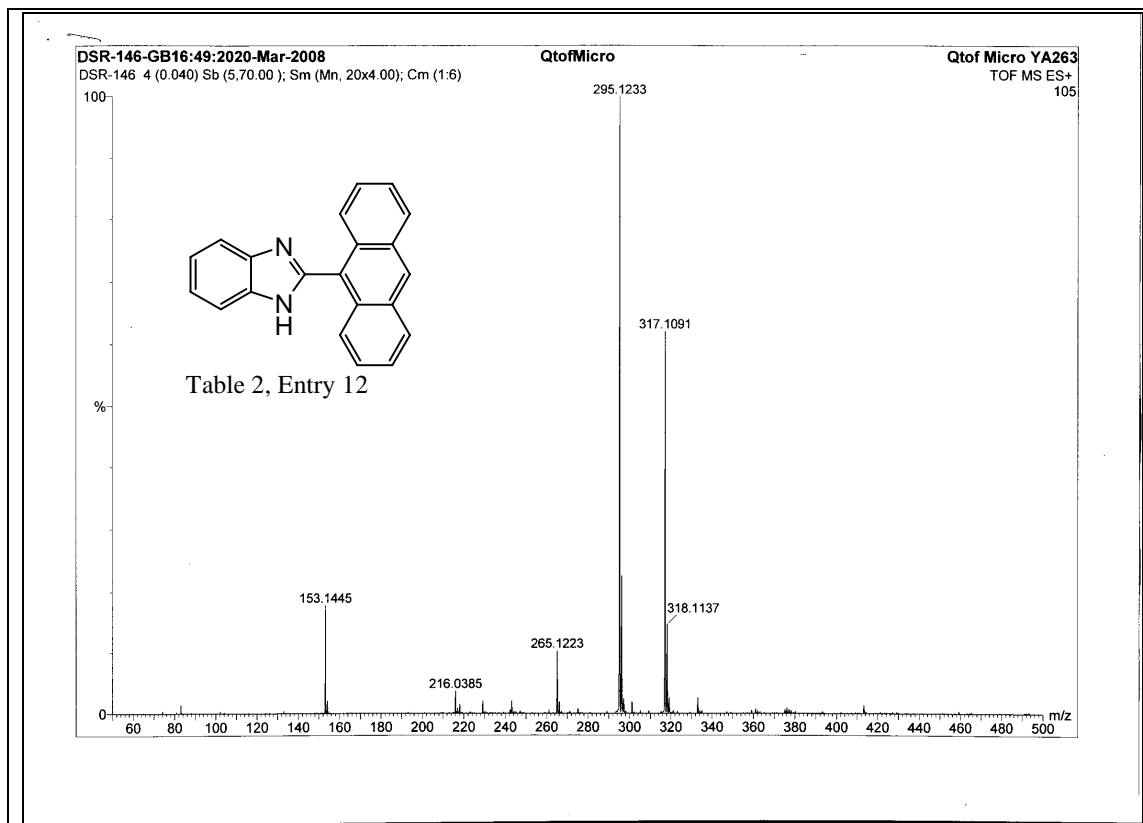

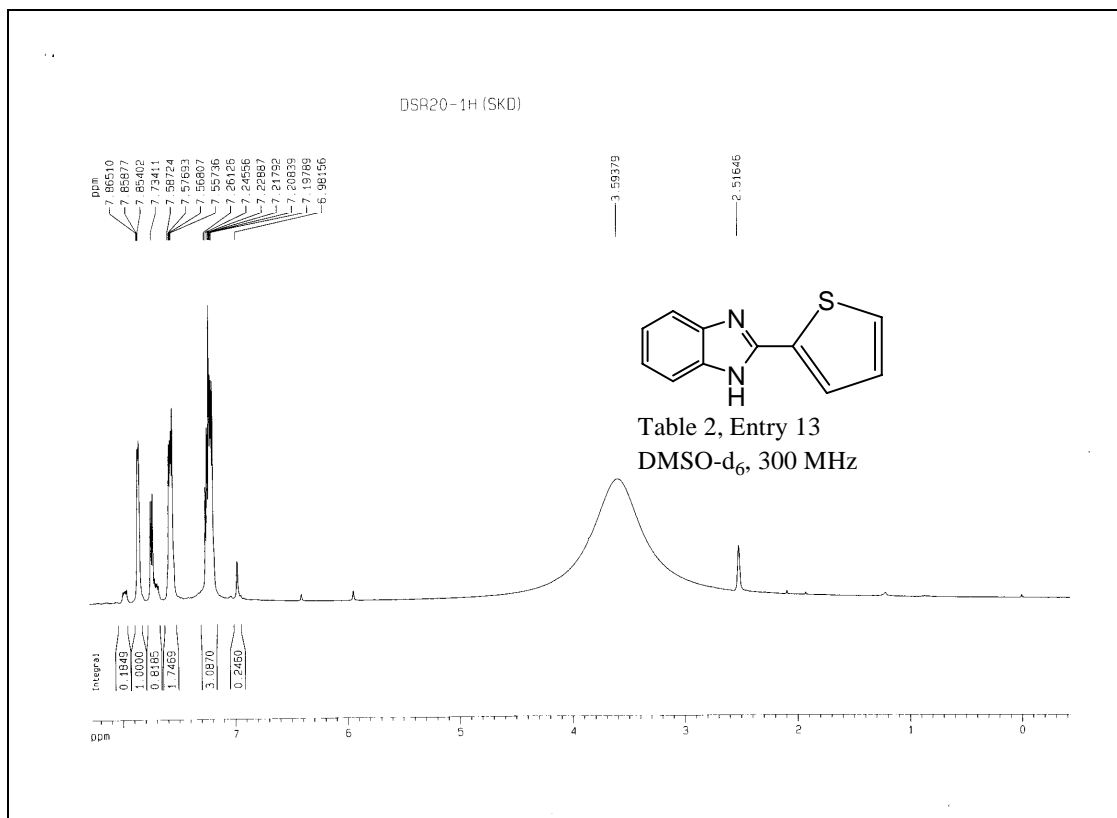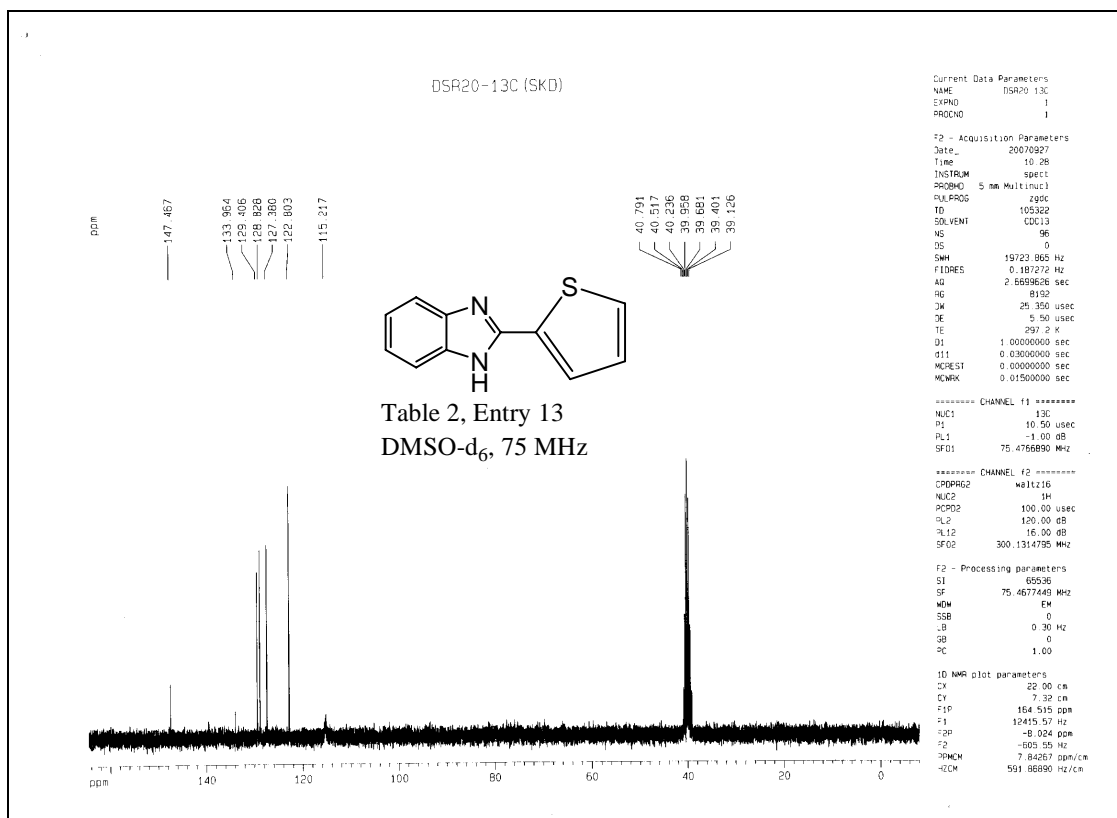

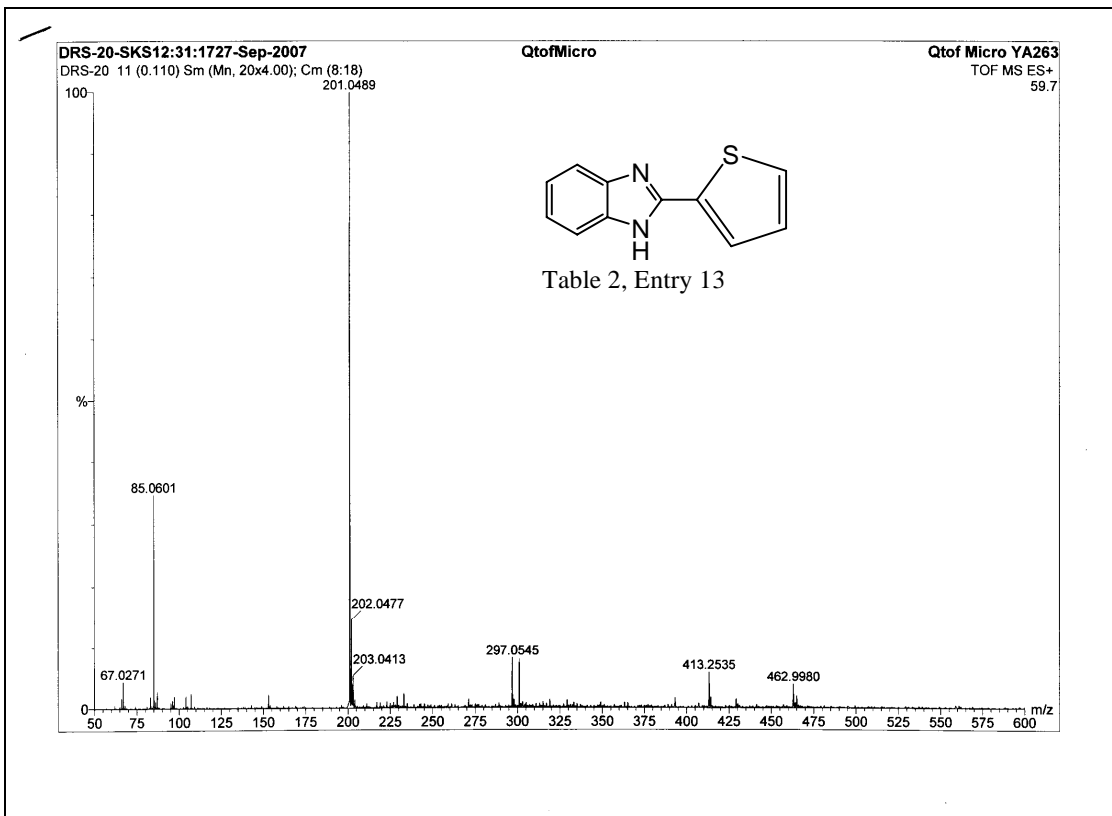

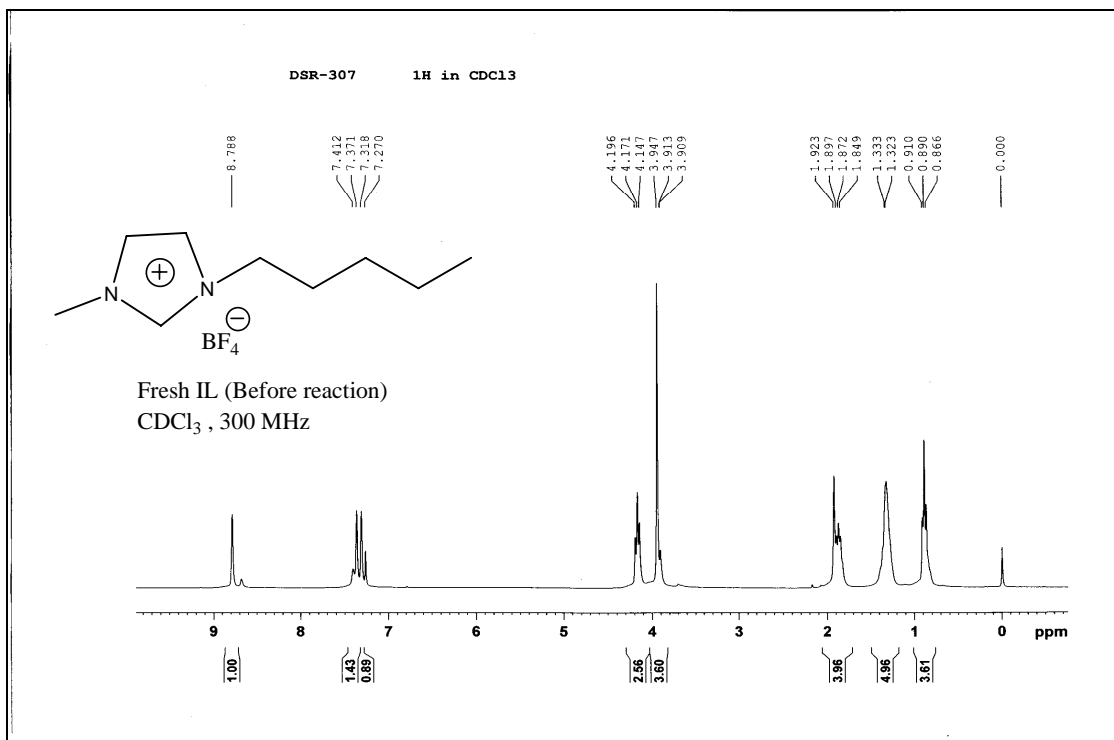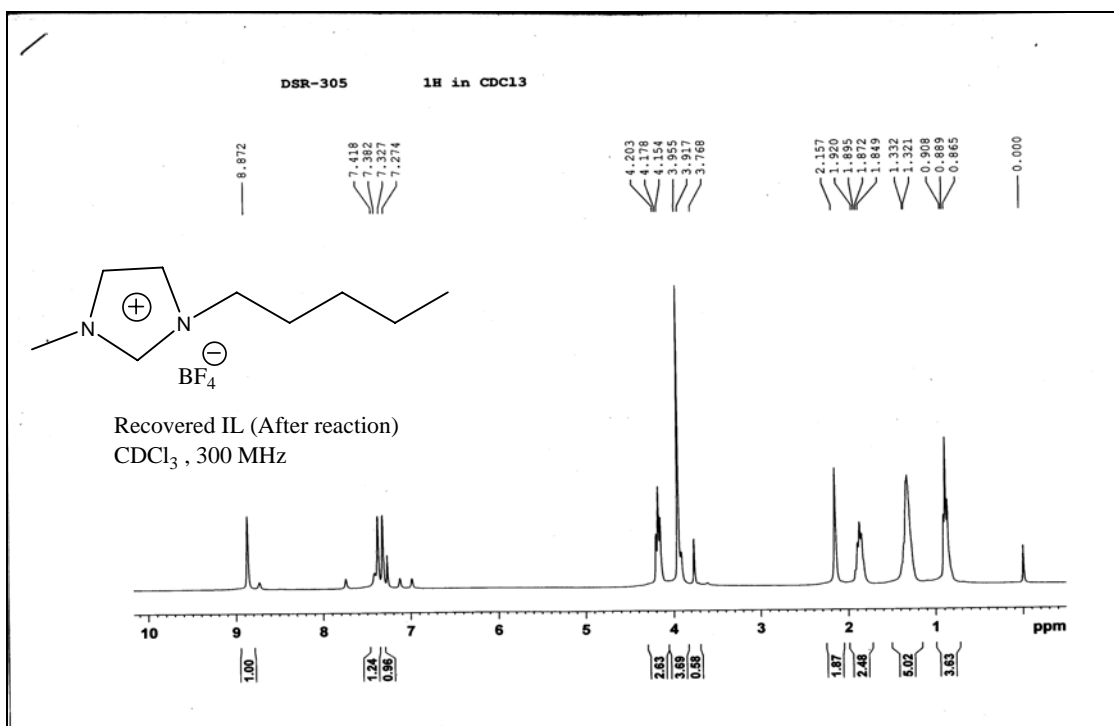

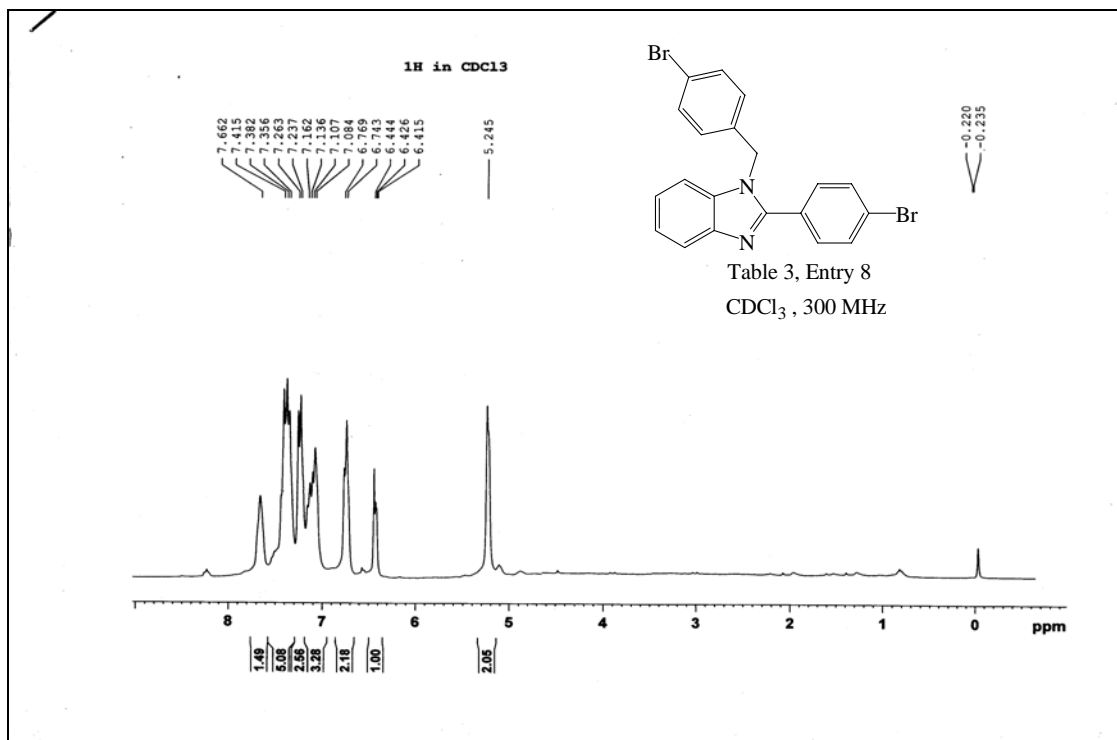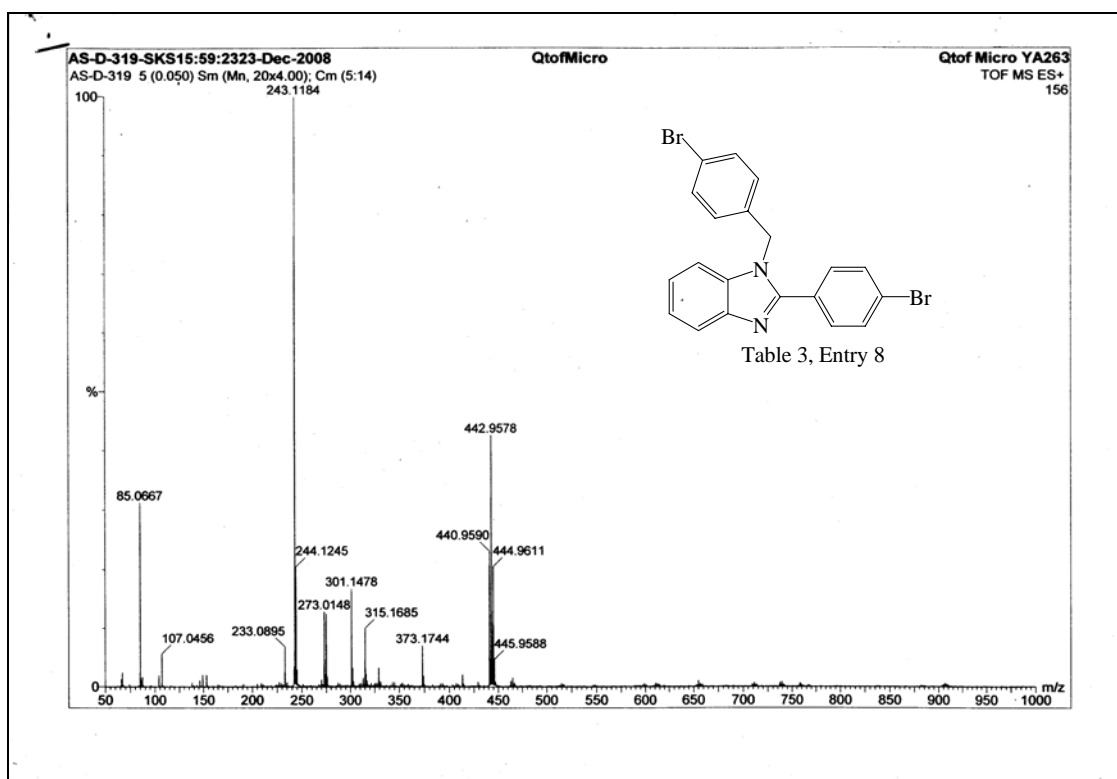

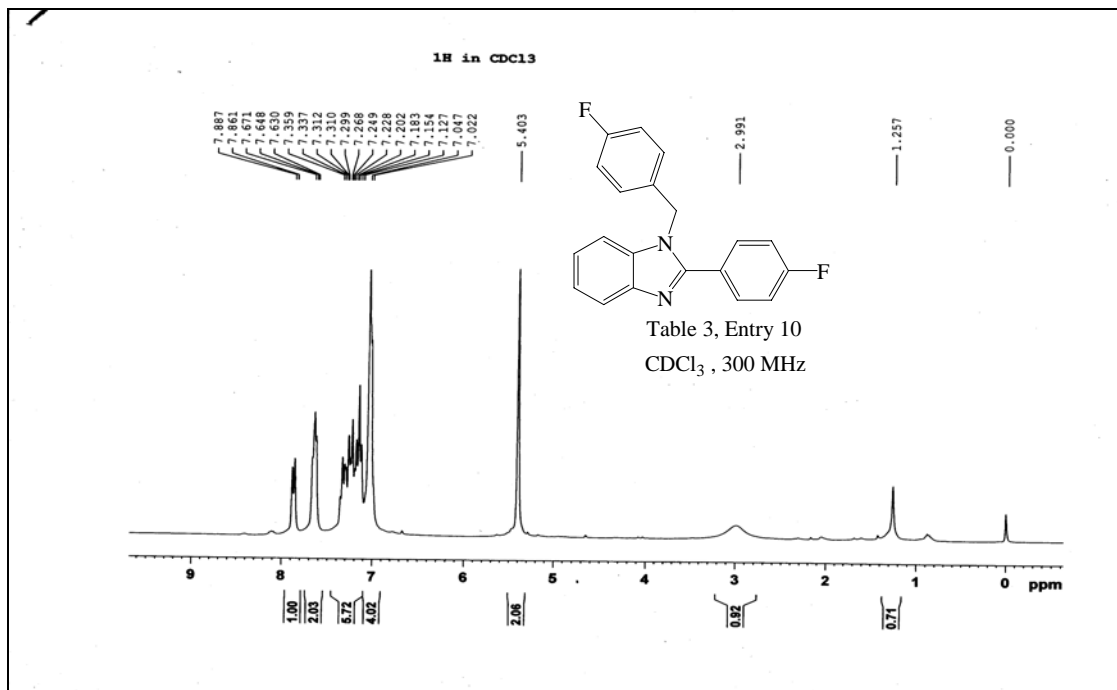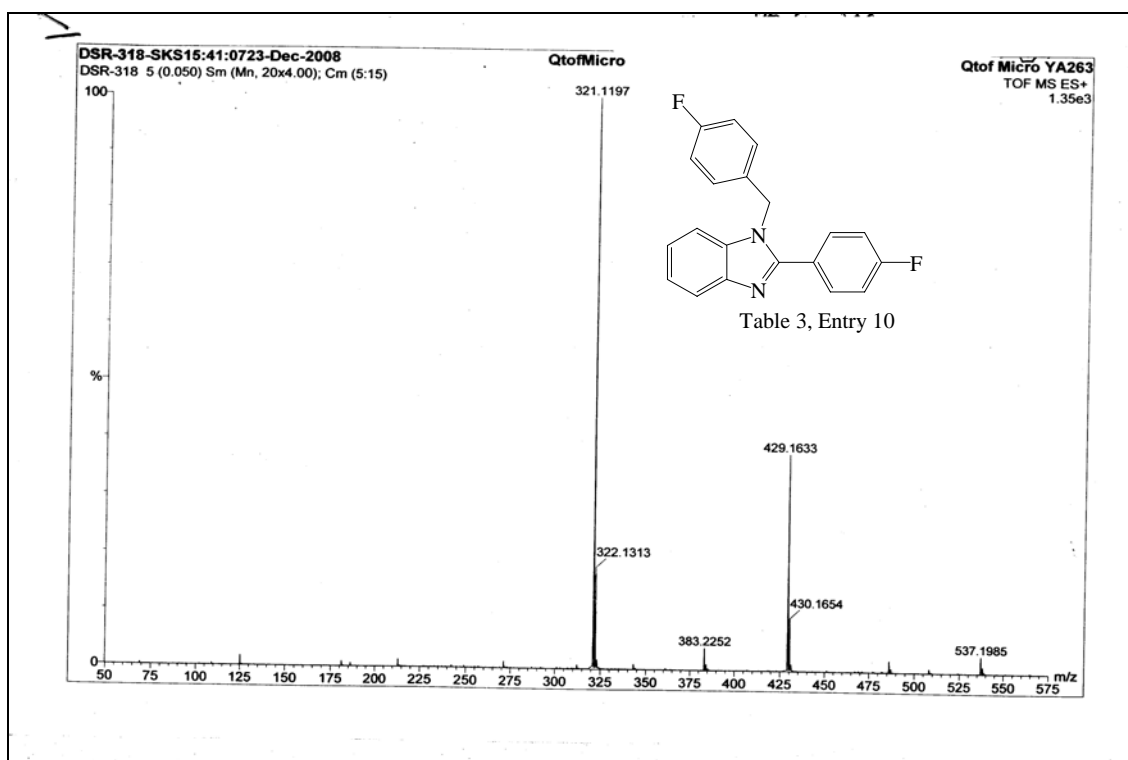

Supplement: b823543k.pdf [file b823543k.pdf]
